# Supplementary material for: Attitudes and intentions of parents towards the COVID-19 vaccine for their children at a special moment of the pandemic
Source: PeerJ. 2024 Sep 25;12:e18056. doi: 10.7717/peerj.18056 (PMC11438426; doi:10.7717/peerj.18056)
Supplement: Supplemental Information 2 — The raw dataset includes sociodemographic information, COVID-19 Anxiety Scale score, and Scale of Attitudes Towards COVID-19 Vaccine score for all participants. [file peerj-12-18056-s002.xlsx]

## Sheet: Sayfa1
No	Age	Gender	Education Level	Employment status	Income status	Child's age	Childhood chronic illness	Family history of COVID-19 disease	Parents' COVID-19 vaccination status	Childhood vaccination status	Parents' intentions to vaccinate their children with COVID-19	Status of recive information about the COVID-19 vaccine	Who	Who	Who	Who	Who	CAS1	CAS2	CAS3	CAS4	CAS5	STCV1	STCV2	STCV3	STCV4	STCV5	STCV6	STCV7	STCV8	STCV9	CAS TOTAL	STCV TOTAL	Child Age Categorical	Parent Age Categorical	(CAS) Anxiety categorical	Parents' intentions to vaccinate their children against COVID-19 are categorical
1	36	1	1	1	2	11	2	0	1	1	1	1	3					0	0	0	0	0	3	4	2	3	3	3	3	2	2	0	25	2	0	0	1
2	29	1	4	1	2	8	2	1	1	1	2	1	3					1	0	1	0	0	3	3	3	3	3	3	3	3	3	2	27	1	0	0	0
3	41	1	4	1	2	11	2	0	1	1	3	0						0	0	0	0	0	3	3	4	3	5	5	5	4	5	0	37	2	1	0	0
4	40	1	5	1	2	11	2	0	1	1	3	1	4					1	1	0	0	0	4	4	4	4	4	4	4	3	4	2	35	2	1	0	0
5	33	1	4	1	2	11	2	0	1	1	3	1	1					0	0	0	0	0	3	3	2	2	3	2	3	1	3	0	22	2	0	0	0
6	34	1	4	1	2	12	2	1	1	1	3	0						0	0	0	0	0	3	3	3	3	4	3	3	2	3	0	27	2	0	0	0
7	42	1	5	2	1	11	1	0	1	1	3	1	3					1	0	0	0	0	5	5	5	4	5	5	5	4	5	1	43	2	1	0	0
8	34	1	5	2	2	12	2	1	0	1	2	0						0	0	0	0	0	2	1	2	2	3	2	2	2	2	0	18	2	0	0	0
9	42	2	4	2	2	11	2	0	0	1	2	0						0	0	0	0	0	2	2	2	2	4	4	2	2	3	0	23	2	1	0	0
10	41	2	4	2	2	12	1	1	1	0	3	1	3					0	0	0	0	0	4	4	4	4	4	4	4	4	4	0	36	2	1	0	0
11	33	1	4	4	3	11	2	0	1	1	1	1	1					0	0	0	0	0	5	5	4	4	3	4	4	4	2	0	35	2	0	0	1
12	42	2	5	2	2	9	2	0	1	0	3	1	3					1	1	0	1	0	1	2	2	2	2	2	2	2	3	3	18	1	1	0	0
13	33	1	1	2	1	12	2	0	1	1	2	1	3					0	0	0	0	0	3	5	3	5	2	2	3	1	2	0	26	2	0	0	0
14	43	2	1	1	2	11	2	1	1	1	1	1	1					0	0	0	0	0	5	4	4	4	4	4	4	3	1	0	33	2	1	0	1
15	33	1	4	1	2	11	2	0	1	1	2	1	5					0	0	0	0	0	2	2	2	4	2	2	3	2	2	0	21	2	0	0	0
16	30	1	4	1	2	11	2	0	1	0	2	1	3					0	0	0	0	0	5	5	5	5	5	5	5	5	2	0	42	2	0	0	0
17	43	2	5	3	2	11	2	0	1	1	2	1	3					0	0	0	0	0	2	2	2	4	4	2	2	1	2	0	21	2	1	0	0
18	52	2	1	2	2	9	2	1	1	1	1	1	5					0	0	0	0	0	5	5	5	3	3	3	3	3	5	0	35	1	1	0	1
19	32	1	4	1	2	8	2	0	1	1	2	1	1					0	0	0	0	0	5	5	5	4	5	4	4	3	5	0	40	1	0	0	0
20	42	1	4	1	2	8	2	0	1	1	2	1	1					0	0	0	0	0	5	5	5	5	3	5	5	5	2	0	40	1	1	0	0
21	36	1	5	2	2	8	2	1	1	1	3	0						2	1	0	1	1	4	4	4	3	4	4	4	3	3	5	33	1	0	1	0
22	43	1	5	4	3	8	2	0	1	0	3	1	1	2	3			0	0	0	0	0	4	3	4	1	5	3	3	3	3	0	29	1	1	0	0
23	37	1	5	1	2	8	2	0	1	1	1	1	1	2	5			0	0	0	0	0	5	5	5	4	5	5	5	5	5	0	44	1	0	0	1
24	42	1	5	1	2	9	2	0	1	1	3	1	3					0	0	0	0	0	3	4	4	3	5	5	4	3	4	0	35	1	1	0	0
25	35	2	4	5	2	8	2	1	0	1	2	1	3					0	0	0	0	0	1	1	1	1	4	3	2	3	2	0	18	1	0	0	0
26	42	1	4	2	2	8	2	0	1	1	2	1	3					0	0	0	0	0	3	3	3	3	3	4	4	3	4	0	30	1	1	0	0
27	38	1	5	2	1	9	2	1	1	0	2	0						0	2	0	2	2	3	4	4	2	4	4	3	2	3	6	29	1	0	1	0
28	53	2	1	5	2	8	2	0	1	1	1	1	3					0	0	0	0	0	1	1	1	1	4	4	4	5	4	0	25	1	1	0	1
29	39	2	5	3	2	10	2	1	1	1	2	1	3					0	0	0	0	0	3	3	3	3	3	3	3	3	3	0	27	2	1	0	0
30	36	2	4	4	2	10	2	1	1	1	3	0						0	0	0	0	0	4	4	4	4	1	4	4	4	3	0	32	2	0	0	0
31	41	2	4	2	1	11	2	1	1	1	2	1	3					0	0	0	0	0	3	5	5	4	5	5	5	3	5	0	40	2	1	0	0
32	36	2	5	3	2	10	1	0	1	1	1	1	3					0	0	0	0	0	5	5	5	5	4	5	4	4	1	0	38	2	0	0	1
33	38	1	5	1	2	11	2	0	1	1	2	1	3					0	0	0	0	0	3	2	3	3	3	3	3	3	3	0	26	2	0	0	0
34	36	1	5	1	2	10	2	1	1	1	2	1	1					0	0	0	0	0	4	4	5	3	3	4	4	3	5	0	35	2	0	0	0
35	38	1	5	5	2	10	1	0	1	1	1	1	3					0	0	0	0	0	5	5	4	4	5	4	5	3	4	0	39	2	0	0	1
36	41	1	5	2	2	10	2	1	1	1	1	1	3					0	1	0	0	0	4	4	4	4	5	4	4	4	4	1	37	2	1	0	1
37	32	1	1	1	2	10	2	1	1	1	3	1	1					0	0	0	0	0	4	4	3	3	2	2	4	4	4	0	30	2	0	0	0
38	46	2	5	3	2	9	2	1	1	1	2	1	1					0	0	0	0	0	2	2	4	2	4	4	4	2	2	0	26	1	1	0	0
39	36	1	5	1	2	8	2	0	0	1	2	0						0	0	0	0	0	1	1	1	1	5	3	2	2	2	0	18	1	0	0	0
40	41	1	5	3	2	9	1	0	1	1	1	1	3					1	0	0	0	0	4	4	4	3	4	4	3	2	4	1	32	1	1	0	1
41	36	1	1	4	2	8	2	0	1	1	2	1	3					0	0	0	0	0	3	5	2	3	3	5	3	3	3	0	30	1	0	0	0
42	36	1	5	3	2	9	2	1	1	0	2	0						0	0	0	0	0	3	4	3	4	3	4	2	3	3	0	29	1	0	0	0
43	33	1	5	1	2	9	2	0	1	1	3	0						0	0	1	0	0	3	3	3	3	4	3	3	2	3	1	27	1	0	0	0
44	38	1	1	2	2	9	2	1	1	1	3	1	2					0	0	0	0	0	5	5	5	3	5	1	2	2	2	0	30	1	0	0	0
45	39	1	5	3	3	9	2	1	1	1	2	1	3					0	0	0	0	0	5	3	5	4	5	5	5	5	5	0	42	1	1	0	0
46	40	2	5	5	3	10	2	1	1	1	2	1	2	5				0	0	0	0	0	2	3	3	3	4	5	3	4	4	0	31	2	1	0	0
47	33	1	1	1	2	9	2	0	1	1	3	1	3					0	0	0	1	1	4	4	4	4	5	5	5	5	5	2	41	1	0	0	0
48	44	1	4	2	2	10	2	1	1	1	3	1	3					0	0	0	0	0	4	3	4	3	4	4	4	3	3	0	32	2	1	0	0
49	35	2	4	2	2	8	2	1	1	0	3	1	1					0	0	0	0	0	4	4	4	4	5	3	5	2	5	0	36	1	0	0	0
50	45	1	5	3	2	9	2	1	1	1	2	1	1					0	0	0	0	0	4	4	4	3	2	4	4	3	3	0	31	1	1	0	0
51	29	1	1	4	2	9	2	0	1	1	1	1	1					0	0	0	0	0	3	3	4	3	5	2	3	3	4	0	30	1	0	0	1
52	32	1	4	1	2	6	2	0	1	1	2	1	1					0	0	0	0	0	5	5	5	4	5	5	5	3	5	0	42	1	0	0	0
53	42	1	5	3	2	7	2	0	1	1	3	1	1					0	0	0	0	0	4	4	4	3	2	4	4	4	4	0	33	1	1	0	0
54	45	1	4	4	2	7	2	0	1	1	2	0						0	0	0	0	0	3	3	4	3	3	3	3	3	3	0	28	1	1	0	0
55	42	1	1	1	2	7	2	0	1	1	2	0						0	0	0	0	0	4	4	4	4	2	3	3	1	1	0	26	1	1	0	0
56	48	2	5	5	3	6	2	1	1	1	2	0						0	0	0	2	0	3	4	3	4	2	3	3	2	2	2	26	1	1	0	0
57	38	2	4	4	2	7	2	0	0	1	2	0						0	0	0	0	0	5	2	2	2	3	3	3	3	2	0	25	1	0	0	0
58	42	2	5	3	2	8	2	0	1	1	3	1	3					0	0	0	0	0	5	5	3	5	4	4	3	3	2	0	34	1	1	0	0
59	46	2	4	4	3	7	2	0	1	0	2	0						0	0	0	0	0	3	4	4	2	1	4	4	2	2	0	26	1	1	0	0
60	42	1	5	3	3	8	1	1	1	1	1	1	3					1	1	0	0	0	5	5	5	5	5	5	5	3	5	2	43	1	1	0	1
61	33	1	4	1	3	9	2	0	1	0	3	0						0	0	0	0	0	4	3	4	4	4	4	3	4	4	0	34	1	0	0	0
62	43	1	1	1	1	8	2	0	1	1	2	0						2	2	0	0	0	4	4	4	4	1	4	4	4	4	4	33	1	1	0	0
63	32	1	5	5	3	8	2	0	1	1	2	1	1					0	0	0	0	0	3	5	5	4	3	4	4	4	4	0	36	1	0	0	0
64	40	2	5	4	2	9	2	1	1	1	3	1	2	3				0	0	0	0	0	4	3	3	3	5	4	4	2	3	0	31	1	1	0	0
65	46	1	5	5	2	9	2	0	1	1	2	1	1	3				0	0	0	0	0	1	1	1	2	5	2	3	1	2	0	18	1	1	0	0
66	48	2	5	3	2	9	2	1	1	1	2	1	3					0	0	0	0	0	3	3	3	3	4	4	4	3	4	0	31	1	1	0	0
67	40	2	4	2	2	8	2	1	1	1	2	0						0	0	0	0	0	3	3	3	3	3	3	3	3	3	0	27	1	1	0	0
68	43	1	1	2	1	9	2	0	1	1	2	1	4					0	1	1	1	1	3	1	3	5	1	5	5	5	2	4	30	1	1	0	0
69	43	1	5	3	2	9	2	1	1	0	3	1	3	4	5			0	0	0	0	0	4	4	4	3	4	4	4	3	3	0	33	1	1	0	0
70	40	1	4	3	2	9	2	1	1	1	1	1	1	2	3			0	0	0	0	0	4	4	4	4	4	4	4	4	4	0	36	1	1	0	1
71	51	2	5	2	2	8	2	1	1	1	2	1	3					0	0	0	0	0	4	4	4	4	5	5	5	4	4	0	39	1	1	0	0
72	34	1	1	5	1	10	2	1	1	1	2	1	1					2	0	0	2	0	4	4	4	3	3	3	1	2	3	4	27	2	0	0	0
73	38	1	5	3	2	8	2	0	1	1	2	1	1					0	0	0	0	0	1	1	2	1	3	1	3	1	1	0	14	1	0	0	0
74	40	1	5	3	2	7	2	0	1	1	2	1	2	3				0	0	0	0	0	3	1	4	3	3	4	3	3	4	0	28	1	1	0	0
75	39	1	5	4	3	7	1	1	1	1	2	1	3	4				0	0	0	0	0	3	3	3	3	3	3	3	3	3	0	27	1	1	0	0
76	45	2	5	3	3	7	2	0	1	0	2	1	1					0	0	0	0	0	3	4	4	3	4	4	4	4	3	0	33	1	1	0	0
77	38	1	5	4	3	7	2	0	1	1	2	1	3					0	0	0	0	0	4	3	4	4	5	5	4	3	3	0	35	1	0	0	0
78	41	1	4	1	2	7	2	0	1	1	2	0						2	2	1	0	0	5	5	5	4	4	5	5	5	5	5	43	1	1	1	1
79	47	2	4	4	2	7	2	0	1	1	3	1	3					0	0	0	0	0	4	4	4	4	4	4	4	2	4	0	34	1	1	0	0
80	34	1	5	3	2	7	2	0	1	1	2	0						1	1	0	0	0	3	2	3	3	5	3	4	3	2	2	28	1	0	0	0
81	35	1	5	4	3	7	2	0	1	1	2	1	3					0	0	0	0	0	3	2	1	1	3	2	3	5	2	0	22	1	0	0	0
82	31	1	4	1	2	8	2	0	1	1	2	1	3					0	0	0	0	0	4	4	4	4	4	4	4	4	5	0	37	1	0	0	0
83	34	1	5	3	1	8	2	1	1	1	2	1	3					0	0	0	0	0	3	3	3	1	4	4	3	1	2	0	24	1	0	0	0
84	39	1	5	3	2	8	1	1	1	1	1	1	3					0	0	0	0	0	4	4	4	3	2	3	3	3	5	0	31	1	1	0	1
85	40	2	5	2	2	8	2	0	1	1	1	1	1	3				0	0	0	0	0	5	5	5	5	4	4	4	3	4	0	39	1	1	0	1
86	39	1	5	3	2	8	2	0	1	1	1	1	5					0	0	0	0	0	5	5	5	3	4	4	4	3	4	0	37	1	1	0	1
87	41	1	5	2	2	8	2	1	1	1	1	1	1					0	0	0	0	0	4	4	3	2	4	2	2	4	4	0	29	1	1	0	1
88	34	1	5	3	2	8	2	1	1	1	1	1	3					0	2	2	1	1	5	4	3	3	5	4	4	3	3	6	34	1	0	1	1
89	41	1	4	1	2	8	2	0	1	1	2	0						2	1	0	0	0	4	4	4	4	4	4	4	4	4	3	36	1	1	0	0
90	34	1	5	3	2	7	2	1	1	1	3	0						0	0	0	0	0	4	3	3	3	5	5	4	2	5	0	34	1	0	0	0
91	39	1	5	4	1	8	2	1	1	1	2	1	3					2	1	0	0	0	2	2	2	2	4	3	3	2	5	3	25	1	1	0	0
92	38	1	5	3	2	8	2	1	1	1	3	1	1					2	2	1	1	1	5	5	5	5	5	5	4	4	4	7	42	1	0	1	0
93	41	2	5	3	2	8	2	0	1	1	2	1	3					0	0	0	0	0	4	3	4	4	4	4	4	4	4	0	35	1	1	0	0
94	30	1	5	3	2	8	2	0	1	1	3	1	3					0	0	0	1	0	3	4	4	3	4	3	3	2	3	1	29	1	0	0	0
95	33	1	4	4	2	9	2	0	1	1	1	1	2					0	0	0	0	1	5	4	5	3	3	2	2	3	1	1	28	1	0	0	1
96	42	2	5	2	2	9	2	1	1	1	3	1	3					0	0	0	0	0	3	3	3	3	4	4	3	2	3	0	28	1	1	0	0
97	42	1	4	1	1	9	2	0	1	1	3	1	3					0	0	1	0	0	2	2	2	3	3	4	3	3	3	1	25	1	1	0	0
98	41	2	4	2	2	9	2	0	1	1	1	1	1	3				0	0	0	0	0	4	4	4	4	5	5	5	2	5	0	38	1	1	0	1
99	34	1	4	2	2	7	2	1	1	1	2	0						1	1	1	1	1	4	4	4	3	4	4	4	4	4	5	35	1	0	1	0
100	33	1	4	4	3	7	2	0	1	1	2	1	1					0	0	0	0	0	4	4	4	4	3	4	4	4	3	0	34	1	0	0	0
101	38	2	5	2	2	8	2	1	1	1	3	1	3					2	1	1	0	0	4	5	4	4	4	4	4	2	2	4	33	1	0	0	0
102	44	2	5	3	3	7	2	1	1	1	2	0						1	1	1	0	0	5	5	5	4	2	5	4	5	4	3	39	1	1	0	0
103	41	2	4	1	2	7	2	0	1	1	3	0						0	0	0	0	0	3	3	4	4	5	5	5	4	5	0	38	1	1	0	0
104	37	1	5	3	2	8	2	0	1	1	2	1	3					0	0	0	0	0	5	5	5	4	4	4	3	3	3	0	36	1	0	0	0
105	33	1	4	1	2	7	2	0	1	1	2	1	1					0	0	0	0	0	3	3	1	3	2	2	3	1	3	0	21	1	0	0	0
106	37	1	5	1	1	7	2	0	1	1	2	1	1	2	3	4		0	0	0	0	0	1	3	1	1	3	3	3	1	3	0	19	1	0	0	0
107	38	1	5	1	2	7	2	0	1	1	2	1	3					0	0	0	0	0	3	3	3	2	3	3	3	2	3	0	25	1	0	0	0
108	35	1	5	2	2	9	2	1	1	1	1	0						0	2	0	1	0	5	5	5	3	5	3	3	2	2	3	33	1	0	0	1
109	30	1	4	1	1	7	2	0	1	1	2	1	1					0	0	0	0	0	4	2	5	3	3	4	4	3	4	0	32	1	0	0	0
110	37	2	5	3	2	7	2	1	1	1	2	1	1					0	0	0	0	0	4	4	4	4	4	4	4	4	3	0	35	1	0	0	0
111	38	1	5	3	2	10	2	1	1	1	2	0						0	0	0	0	0	1	1	1	1	2	5	5	1	1	0	18	2	0	0	0
112	48	2	4	3	2	11	2	1	1	1	1	1	1					0	0	0	0	0	5	5	5	5	3	5	3	4	4	0	39	2	1	0	1
113	53	2	5	3	3	11	2	0	1	1	3	0						1	0	0	0	0	4	4	4	4	3	4	4	4	4	1	35	2	1	0	0
114	40	1	5	4	2	10	2	0	1	1	2	1	3					0	1	0	1	1	5	3	4	3	4	4	3	3	4	3	33	2	1	0	0
115	52	1	5	3	2	11	2	0	1	1	3	0						0	0	0	0	0	4	3	4	3	3	4	3	3	3	0	30	2	1	0	0
116	36	1	4	1	2	11	2	1	1	1	3	0						0	0	0	0	0	3	4	5	4	4	4	4	3	5	0	36	2	0	0	0
117	48	2	4	2	2	10	2	1	1	1	3	0						0	0	0	0	0	5	4	4	4	5	5	5	4	4	0	40	2	1	0	0
118	31	1	5	4	2	11	2	0	1	1	2	1	1					0	0	0	0	0	4	3	2	3	3	3	4	3	2	0	27	2	0	0	0
119	40	1	1	1	2	11	2	0	1	1	2	1	3					0	0	0	2	0	4	5	4	4	4	4	4	3	3	2	35	2	1	0	0
120	44	2	5	2	1	11	2	1	1	1	2	0						0	0	0	0	0	2	3	3	3	3	2	3	4	4	0	27	2	1	0	0
121	46	2	5	2	3	11	2	0	1	1	2	0						0	0	0	0	0	3	3	3	3	4	4	3	3	3	0	29	2	1	0	0
122	45	2	5	3	2	12	1	0	1	1	1	1	1	3				0	0	0	0	0	4	4	4	4	5	4	4	4	5	0	38	2	1	0	1
123	27	2	5	3	2	12	2	0	1	1	3	1	3					0	0	0	0	0	3	3	2	1	4	1	3	1	1	0	19	2	0	0	0
124	46	1	1	1	1	12	2	0	1	1	1	1	1					0	0	0	0	0	4	5	5	3	5	5	5	4	4	0	40	2	1	0	1
125	40	1	4	2	1	11	2	1	1	1	1	0						0	0	0	0	0	4	5	5	3	4	4	4	3	3	0	35	2	1	0	1
126	38	2	4	4	3	10	2	0	0	0	2	0						0	0	0	0	0	5	2	2	2	3	3	3	3	2	0	25	2	0	0	0
127	37	1	4	1	2	13	2	1	1	0	1	1	4					0	0	0	0	0	4	4	5	5	3	4	4	4	4	0	37	2	0	0	1
128	27	2	5	3	2	12	2	0	1	1	3	1	3					0	0	0	0	0	3	3	2	1	4	1	4	1	1	0	20	2	0	0	0
129	38	2	4	4	2	12	2	1	1	1	1	1	3					0	0	0	0	0	5	5	5	5	2	5	5	3	5	0	40	2	0	0	1
130	41	2	1	2	2	10	2	0	0	1	3	0						0	0	0	0	0	3	3	3	4	2	3	2	3	2	0	25	2	1	0	0
131	49	1	5	3	3	11	2	1	0	1	2	1	3					0	0	0	0	0	3	2	2	4	4	4	4	3	3	0	29	2	1	0	0
132	40	2	1	1	1	11	2	1	1	1	2	1	1					0	0	0	0	0	2	2	2	2	4	4	3	1	1	0	21	2	1	0	0
133	32	1	1	1	2	12	1	1	1	1	3	1	3					2	3	1	2	2	5	5	5	5	5	5	5	5	5	10	45	2	0	1	0
134	39	1	5	2	1	11	1	1	1	1	1	1	3					2	2	1	0	0	5	5	5	5	5	5	5	5	5	5	45	2	1	1	1
135	41	2	4	2		12	2	1	1	1	2	1	3					0	0	0	0	0	3	3	3	3	3	3	3	3	3	0	27	2	1	0	0
136	40	2	5	3	3	11	2	0	1	1	1	1	3					0	0	0	0	0	5	5	5	5	5	5	5	3	5	0	43	2	1	0	1
137	40	2	4	2	3	12	2	1	1	1	3	1	1					0	1	0	1	1	4	4	5	4	2	4	4	4	4	3	35	2	1	0	0
138	46	2	1	5	1	12	2	1	1	1	3	1	3					1	1	1	1	2	3	3	3	3	3	3	4	2	2	6	26	2	1	1	0
139	40	1	4	1	2	12	2	1	1	1	2	1	1					0	0	0	0	0	3	3	4	1	3	3	3	3	3	0	26	2	1	0	0
140	41	2	4	4	2	11	2	1	1	1	2	0						0	0	1	1	0	3	3	3	3	4	5	5	3	2	2	31	2	1	0	0
141	38	1	1	1	1	12	2	1	1	1	2	1	3					0	0	0	0	0	3	3	3	5	3	3	3	1	3	0	27	2	0	0	0
142	38	2	1	2	1	12	2	0	1	0	2	1	4					0	0	0	0	0	1	1	1	1	4	1	1	1	1	0	12	2	0	0	0
143	34	1	1	1	3	12	2	1	1	1	2	1	1					1	1	1	1	1	4	4	4	4	4	4	4	2	4	5	34	2	0	1	0
144	36	1	1	1	2	12	2	1	1	1	3	1	3					0	1	0	0	1	4	4	4	3	4	4	5	4	3	2	35	2	0	0	0
145	40	1	1	2	2	12	2	1	1	1	2	0						0	0	0	0	0	2	2	2	3	4	3	3	3	3	0	25	2	1	0	0
146	35	1	1	3	2	12	2	1	1	1	2	0						0	0	0	0	0	2	2	2	3	4	3	3	3	3	0	25	2	0	0	0
147	42	1	5	1	2	12	2	1	1	1	1	1	4					0	0	0	0	0	4	3	3	3	3	4	3	4	3	0	30	2	1	0	1
148	33	1	4	1	2	12	2	0	1	1	1	1	2					0	1	0	1	0	5	5	4	3	2	4	3	3	4	2	33	2	0	0	1
149	48	1	1	2	2	13	2	0	1	1	3	1	3					0	0	0	0	0	4	4	4	3	5	3	3	1	2	0	29	2	1	0	0
150	48	1	1	5	2	11	2	1	1	1	1	1	3					0	0	0	0	0	5	5	5	3	1	4	4	3	3	0	33	2	1	0	1
151	38	1	1	4	2	11	2	0	1	1	1	1	3					0	0	0	0	0	5	5	4	3	4	4	4	3	5	0	37	2	0	0	1
152	53	2	5	5	1	12	2	1	1	1	1	1	3					0	0	0	0	0	5	5	5	5	5	5	5	4	3	0	42	2	1	0	1
153	40	1	1	1	1	11	2	1	1	0	3	0						0	0	0	0	0	4	4	4	3	3	3	3	3	4	0	31	2	1	0	0
154	40	2	5	2	3	8	1	1	1	1	3	1	1	2	3	4		0	0	0	0	0	4	4	4	3	4	5	5	2	3	0	34	1	1	0	0
155	32	1	5	3	3	8	2	0	1	1	2	1	1	2	3			0	0	0	0	0	4	4	3	2	4	4	4	2	3	0	30	1	0	0	0
156	44	1	4	1	1	7	1	1	1	1	1	1	3					0	0	0	0	0	5	5	5	3	4	4	3	3	4	0	36	1	1	0	1
157	35	2	5	3	3	9	2	1	1	1	2	1	3					0	0	0	0	0	4	4	4	4	5	5	5	5	4	0	40	1	0	0	0
158	42	2	5	3	3	10	2	1	1	1	2	1	3					0	0	0	0	0	4	4	3	4	5	5	5	2	2	0	34	2	1	0	0
159	40	1	5	3	1	9	2	1	1	0	3	1	5					1	1	0	1	0	4	2	4	3	4	3	3	3	3	3	29	1	1	0	0
160	41	1	5	1	2	9	2	0	1	1	3	1	3					2	2	0	1	0	5	5	5	3	5	5	3	3	4	5	38	1	1	1	0
161	41	2	5	3	3	9	2	0	1	1	1	1	3					0	2	0	0	0	5	5	5	4	4	5	5	3	5	2	41	1	1	0	1
162	37	1	5	3	2	9	2	1	0	1	2	1	5					0	0	0	0	0	1	1	1	1	5	2	2	2	2	0	17	1	0	0	0
163	42	1	5	4	3	8	2	1	0	1	2	1	3					0	0	0	0	0	1	1	1	1	1	1	1	1	3	0	11	1	1	0	0
164	39	1	5	2	2	10	2	0	1	1	3	1	5					0	0	0	0	0	5	4	4	3	5	3	3	3	3	0	33	2	1	0	0
165	42	2	5	4	2	9	2	0	1	1	1	1	1					0	0	0	0	0	5	5	5	4	5	5	5	3	5	0	42	1	1	0	1
166	43	1	4	1	1	10	2	1	1	1	3	0						1	0	0	1	0	3	3	2	4	4	4	4	4	4	2	32	2	1	0	0
167	47	2	5	3	2	9	2	1	1	1	1	1	1	3	5			0	0	0	0	0	5	5	4	4	2	4	3	4	4	0	35	1	1	0	1
168	37	1	5	3	3	9	2	1	1	1	3	1	2					0	0	0	0	0	4	5	4	4	5	5	5	3	4	0	39	1	0	0	0
169	37	2	5	3	1	8	2	1	0	1	2	1	3					0	0	0	0	0	2	2	3	3	3	3	3	3	4	0	26	1	0	0	0
170	45	1	4	1	2	9	2	0	1	1	3	0						0	0	0	0	0	3	4	4	4	4	4	4	4	4	0	35	1	1	0	0
171	38	1	5	4	3	9	2	0	1	1	2	1	3					0	0	0	0	0	4	5	3	4	5	4	4	3	4	0	36	1	0	0	0
172	41	1	5	3	2	9	2	1	1	0	2	1	3					0	0	0	2	0	3	2	3	4	5	5	5	3	2	2	32	1	1	0	0
173	34	1	4	1	2	9	2	1	1	1	3	1	3					0	0	0	0	0	4	4	4	4	2	4	4	3	4	0	33	1	0	0	0
174	45	1	5	4	3	11	2	0	1	1	1	1	1	3				0	0	0	0	0	4	4	3	2	2	4	3	2	3	0	27	2	1	0	1
175	36	1	5	3	2	10	2	0	1	1	1	1	3					1	1	1	1	1	4	4	4	4	3	4	4	4	3	5	34	2	0	1	1
176	37	2	5	3	2	10	1	1	1	1	3	0						1	0	0	0	0	3	3	4	3	4	3	3	2	2	1	27	2	0	0	0
177	30	1	5	3	2	10	2	0	1	1	2	1	3					0	0	0	0	0	4	4	3	3	5	3	3	3	3	0	31	2	0	0	0
178	42	1	5	3	2	10	2	0	1	1	3	1	3					1	1	2	1	1	5	5	5	4	4	5	3	3	4	6	38	2	1	1	0
179	36	1	5	3	2	10	2	1	1	1	2	1	2					0	0	0	0	0	3	2	3	2	3	4	4	3	3	0	27	2	0	0	0
180	39	2	5	3	2	10	1	0	1	1	1	0						2	2	1	0	0	5	5	5	5	5	5	5	5	5	5	45	2	1	1	1
181	34	2	5	2	1	10	2	1	1	1	3	1	3					0	0	0	0	0	4	4	4	1	4	3	3	3	3	0	29	2	0	0	0
182	42	1	5	4	2	10	2	1	1	1	2	0						0	0	0	0	0	3	3	3	3	5	4	5	3	3	0	32	2	1	0	0
183	44	1	5	2	2	10	1	1	1	1	3	1	5					0	0	0	0	0	4	5	4	3	4	4	4	3	5	0	36	2	1	0	0
184	42	2	5	4	2	10	2	1	1	1	2	1	3					0	0	0	0	0	3	2	2	4	4	2	4	2	2	0	25	2	1	0	0
185	42	1	5	1	2	9	2	1	1	1	2	1	1					0	0	0	0	0	4	4	4	4	2	3	3	1	1	0	26	1	1	0	0
186	32	2	5	3	2	8	2	1	1	1	3	0						0	0	0	0	0	4	4	4	4	4	2	5	3	4	0	34	1	0	0	0
187	36	1	1	1	1	8	2	1	1	1	3	1	2					0	0	0	0	0	3	2	2	3	4	4	4	3	4	0	29	1	0	0	0
188	36	1	4	3	2	8	2	0	1	1	3	1	3					0	0	0	0	0	4	4	4	4	2	3	3	3	3	0	30	1	0	0	0
189	35	2	4	4	2	9	2	0	1	1	3	0						0	0	0	0	0	3	4	4	2	2	3	3	2	3	0	26	1	0	0	0
190	46	1	1	1	2	8	2	0	1	1	3	0						0	1	0	0	0	3	4	4	2	2	4	4	3	2	1	28	1	1	0	0
191	43	1	5	1	2	8	2	1	1	0	2	0						0	0	0	0	0	3	3	3	3	3	3	3	3	3	0	27	1	1	0	0
192	45	2	5	3	3	8	2	1	1	1	3	1	3					0	0	0	0	0	4	5	4	4	5	5	5	3	3	0	38	1	1	0	0
193	38	1	5	1	1	8	2	1	1	1	1	1	3					0	0	0	0	0	5	5	5	5	5	5	5	5	5	0	45	1	0	0	1
194	34	1	5	3	2	8	2	1	1	1	3	1	3					0	0	0	0	0	4	5	5	4	4	4	3	3	4	0	36	1	0	0	0
195	34	1	1	2	3	8	2	0	1	0	2	1	5					0	0	0	0	0	5	3	4	3	4	4	4	3	4	0	34	1	0	0	0
196	37	1	1	2	3	9	2	0	1	0	2	0						0	0	0	0	0	3	3	3	3	3	3	3	3	3	0	27	1	0	0	0
197	35	1	5	3	2	8	2	0	1	1	2	1	5					0	0	0	0	0	4	4	3	2	4	3	3	2	3	0	28	1	0	0	0
198	47	2	5	3	2	11	2	0	1	1	3	1	3	4				1	1	1	0	1	3	3	2	3	3	3	4	1	2	4	24	2	1	0	0
199	38	1	5	3	1	12	2	0	0	1	2	1	1	3				0	0	0	0	0	3	3	3	2	2	2	3	2	3	0	23	2	0	0	0
200	42	2	5	3	2	12	2	0	1	1	1	1	3					0	0	0	0	0	5	5	5	5	5	5	5	4	4	0	43	2	1	0	1
201	42	2	4	2	1	12	2	1	1	1	1	1	1	3	4			0	0	0	0	0	5	5	5	5	2	3	2	3	2	0	32	2	1	0	1
202	47	2	4	4	2	10	2	0	1	1	2	0						0	0	0	0	0	2	2	2	3	2	2	3	2	2	0	20	2	1	0	0
203	40	1	5	1	2	11	2	0	1	1	3	1	3					0	0	0	0	0	3	4	4	3	3	4	4	3	4	0	32	2	1	0	0
204	45	2	5	3	2	12	2	1	1	1	1	1	3					0	0	0	0	0	5	5	5	5	5	5	5	5	5	0	45	2	1	0	1
205	52	2	5	3	3	12	2	0	1	1	3	1	3					0	0	0	0	0	4	4	3	4	5	3	5	4	3	0	35	2	1	0	0
206	41	1	5	1	3	12	2	1	1	0	3	1	4					0	1	0	0	0	5	4	5	5	5	5	5	5	5	1	44	2	1	0	0
207	54	2	1	4	1	12	2	1	1	1	2	1	3					0	0	0	0	0	2	2	4	2	4	3	3	3	2	0	25	2	1	0	0
208	34	1	1	1	1	10	2	1	1	1	2	0						0	0	0	0	0	2	2	2	2	3	2	2	3	2	0	20	2	0	0	0
209	45	1	1	1	2	11	2	1	1	1	1	0						0	0	0	0	0	5	5	5	5	5	5	5	3	5	0	43	2	1	0	1
210	42	1	4	1	2	11	2	0	1	1	1	1	5					0	0	0	0	0	5	5	5	5	5	3	4	4	3	0	39	2	1	0	1
211	38	1	4	3	2	6	1	1	1	1	3	1	5					0	0	0	0	0	4	4	4	4	2	5	4	3	4	0	34	1	0	0	0
212	38	1	4	2	2	12	2	0	1	1	2	0						0	0	0	0	0	1	1	1	1	3	1	3	1	1	0	13	2	0	0	0
213	45	2	5	3	2	11	2	1	1	1	2	1	1	3				0	0	0	0	0	1	1	1	4	5	5	5	5	5	0	32	2	1	0	0
214	33	1	4	1	2	11	2	0	1	1	2	0						0	0	0	0	0	4	5	5	3	4	3	5	3	5	0	37	2	0	0	0
215	44	2	5	4	1	10	2	1	0	1	2	1	3					0	0	0	0	0	3	2	2	2	3	2	4	2	2	0	22	2	1	0	0
216	36	2	5	3	3	7	2	0	1	1	1	1	1	3				0	0	0	0	0	5	5	5	5	5	5	5	5	5	0	45	1	0	0	1
217	35	2	5	4	2	9	2	0	1	1	3	0						0	0	0	0	0	4	3	3	3	2	4	3	3	3	0	28	1	0	0	0
218	39	1	5	3	3	8	2	0	1	1	1	1	1					0	0	1	1	1	4	4	4	4	4	4	4	4	4	3	36	1	1	0	1
219	40	2	5	3	3	8	1	1	1	1	3	1	1					0	0	0	0	0	4	3	4	4	4	4	4	4	4	0	35	1	1	0	0
220	44	2	1	4	3	11	2	0	0	1	3	0						0	0	0	0	0	3	3	3	3	3	3	3	3	4	0	28	2	1	0	0
221	52	1	5	3	2	11	2	1	1	1	3	1	3					0	0	0	0	0	4	2	3	4	4	3	4	4	4	0	32	2	1	0	0
222	40	1	5	3	2	12	2	1	1	0	3	1	1	2	3	4		0	0	0	0	1	4	4	2	2	3	3	3	3	5	1	29	2	1	0	0
223	47	1	4	5	2	12	2	0	1	1	1	1	3					0	0	0	0	0	4	4	4	3	3	4	3	3	4	0	32	2	1	0	1
224	40	2	5	3	2	12	2	0	0	1	3	1	3					0	0	0	0	0	2	3	2	2	3	2	3	2	2	0	21	2	1	0	0
225	37	1	1	2	1	11	2	1	1	1	3	1	1					0	0	0	0	0	1	1	2	1	5	5	5	1	1	0	22	2	0	0	0
226	45	1	1	2	2	11	2	1	1	1	2	0						0	0	0	0	0	2	2	3	2	3	4	3	5	3	0	27	2	1	0	0
227	40	2	5	2	1	10	2	1	1	1	3	1	3					0	0	0	0	0	3	4	4	1	5	5	5	2	3	0	32	2	1	0	0
228	36	1	1	1	2	11	2	0	1	1	1	1	2					0	0	0	0	0	4	4	4	4	2	4	4	4	4	0	34	2	0	0	1
229	40	2	5	2	2	10	1	1	1	1	2	1	1					0	0	0	0	0	3	5	3	4	5	4	3	2	2	0	31	2	1	0	0
230	28	1	4	3	2	11	2	0	1	1	3	0						0	0	0	0	0	3	3	3	4	3	3	3	3	3	0	28	2	0	0	0
231	42	2	4	4	2	10	2	1	1	1	2	1	3					0	0	0	0	0	4	4	3	3	4	3	3	1	2	0	27	2	1	0	0
232	40	2	5	4	2	11	2	1	0	1	3	1	1					0	0	0	0	0	3	2	3	3	3	2	3	1	1	0	21	2	1	0	0
233	40	1	4	2	2	10	2	1	1	1	3	1	3					0	0	0	0	0	3	3	3	3	4	4	3	2	3	0	28	2	1	0	0
234	41	1	5	3	1	11	2	0	1	1	1	1	5					0	1	0	0	0	5	5	5	5	5	5	5	3	5	1	43	2	1	0	1
235	37	2	1	1	3	11	2	0	1	1	3	1	3					0	0	0	0	0	3	4	4	3	5	5	5	5	5	0	39	2	0	0	0
236	39	1	5	3	2	11	2	0	1	1	1	1	3					0	1	0	1	1	5	5	5	5	5	5	5	5	5	3	45	2	1	0	1
237	38	2	1	2	1	11	2	0	1	1	1	1	1					0	0	0	0	0	5	5	5	5	5	5	5	5	5	0	45	2	0	0	1
238	41	2	4	2	2	11	2	1	1	1	1	1	3					0	0	0	0	0	4	4	4	4	2	4	4	4	4	0	34	2	1	0	1
239	38	2	4	2	3	11	2	1	1	0	3	0						0	0	0	0	0	4	3	1	3	1	3	3	3	1	0	22	2	0	0	0
240	55	2	1	5	2	11	2	1	0	1	2	1	3					2	0	0	0	0	1	2	2	4	3	4	4	3	2	2	25	2	1	0	0
241	44	2	4	2	2	11	2	1	1	1	2	1	3					0	0	0	0	0	1	1	3	1	3	5	3	2	2	0	21	2	1	0	0
242	30	2	5	4	2	10	2	0	0	1	2	1	3					0	0	0	0	0	3	2	2	3	4	4	4	4	1	0	27	2	0	0	0
243	40	1	4	1	1	11	2	0	1	1	3	0						0	0	0	0	0	3	3	2	3	4	3	3	4	2	0	27	2	1	0	0
244	40	1	5	3	2	11	2	0	1	1	3	1	2					0	0	0	0	0	4	4	5	3	3	3	4	3	3	0	32	2	1	0	0
245	43	2	5	4	3	11	2	1	1	1	3	1	3					0	0	0	0	0	3	3	3	1	5	3	4	2	2	0	26	2	1	0	0
246	47	2	4	4	2	11	2	0	1	1	2	0						0	0	0	0	0	2	2	2	3	2	2	3	2	2	0	20	2	1	0	0
247	43	2	5	3	2	12	2	0	1	1	1	0						1	1	1	1	1	4	4	4	3	4	4	4	4	4	5	35	2	1	1	1
248	38	1	4	3	1	11	2	1	1	1	1	0						0	0	0	0	0	5	5	5	4	3	5	4	4	3	0	38	2	0	0	1
249	44	2	5	3	2	10	2	1	1	1	3	1	3					0	0	0	0	0	4	4	4	4	4	4	4	4	4	0	36	2	1	0	0
250	47	2	4	3	2	12	2	0	1	0	3	1	1	3				0	0	0	0	0	4	4	4	4	2	5	5	5	5	0	38	2	1	0	0
251	33	1	4	1	2	11	2	1	0	1	3	0						0	0	0	0	0	1	2	1	3	4	2	3	1	1	0	18	2	0	0	0
252	42	1	5	3	2	11	2	1	1	1	1	1	1					0	1	1	0	0	5	5	5	5	5	5	5	3	5	2	43	2	1	0	1
253	39	2	5	2	1	11	2	0	1	1	2	1	3					0	0	0	0	0	2	4	3	3	3	4	4	3	3	0	29	2	1	0	0
254	41	1	5	2	1	11	2	1	1	1	2	0						0	0	0	0	0	3	4	3	5	4	3	3	3	2	0	30	2	1	0	0
255	39	1	5	5	3	11	2	1	1	1	3	1	3	5				0	0	0	0	0	3	3	4	3	5	5	5	1	4	0	33	2	1	0	0
256	41	2	5	2	2	11	2	0	1	1	1	1	1					0	1	0	1	0	5	4	5	5	5	5	5	5	5	2	44	2	1	0	1
257	49	1	5	3	2	11	2	1	1	1	2	1	1					0	0	0	0	0	4	5	5	3	3	3	4	3	4	0	34	2	1	0	0
258	36	2	5	3	3	10	2	1	1	1	2	1	1					0	0	0	0	0	4	4	3	4	3	4	4	4	3	0	33	2	0	0	0
259	35	1	5	4	2	11	2	1	1	1	2	1	2					0	0	0	0	0	3	3	3	4	2	4	4	4	4	0	31	2	0	0	0
260	37	1	5	1	1	12	2	0	1	1	2	0						0	0	0	0	0	3	1	3	3	4	3	3	3	3	0	26	2	0	0	0
261	38	1	5	1	2	12	2	1	1	1	3	1	3	4				0	0	0	0	0	4	3	3	3	4	3	4	2	3	0	29	2	0	0	0
262	44	1	5	3	2	12	2	1	1	1	2	1	1					0	0	0	0	0	3	2	2	2	4	2	3	2	2	0	22	2	1	0	0
263	43	1	5	3	2	12	2	1	1	1	3	1	2					0	0	0	0	0	4	4	3	3	4	3	4	3	3	0	31	2	1	0	0
264	45	2	5	4	2	13	2	0	1	1	2	0						0	0	0	0	0	5	5	5	5	5	5	5	5	5	0	45	2	1	0	0
265	42	1	5	1	2	12	2	1	1	1	3	1	3					0	0	0	0	0	5	5	5	5	4	5	5	5	5	0	44	2	1	0	0
266	42	2	5	3	3	12	2	1	1	1	1	1	3					1	2	2	0	0	5	5	5	5	5	5	5	5	5	5	45	2	1	1	1
267	34	1	4	1	2	12	2	1	1	1	2	1	2					1	1	1	0	1	2	2	3	2	3	3	3	3	3	4	24	2	0	0	0
268	42	2	5	3	2	10	2	0	1	1	2	1	3					0	0	0	0	0	3	5	3	3	3	4	3	3	3	0	30	2	1	0	0
269	50	2	4	5	2	12	2	0	1	1	3	1	1					2	3	0	0	0	5	5	5	4	4	5	5	5	5	5	43	2	1	1	0
270	47	1	5	3	3	10	2	1	1	1	2	1	1	3				2	1	0	0	0	4	4	3	3	4	4	4	2	4	3	32	2	1	0	0
271	42	2	5	2	2	11	1	0	1	1	2	1	3					0	0	0	0	0	3	3	3	2	4	2	3	1	3	0	24	2	1	0	0
272	38	2	5	3	2	10	2	1	0	1	2	0						0	0	0	0	0	3	3	3	3	3	3	3	3	3	0	27	2	0	0	0
273	47	2	5	3	2	11	2	1	1	1	3	1	3					0	0	0	0	0	4	5	5	5	5	5	5	3	3	0	40	2	1	0	0
274	38	2	5	3	1	11	2	1	1	1	2	1	1	3				0	0	0	0	0	5	5	5	5	5	5	5	5	5	0	45	2	0	0	0
275	40	2	5	3	2	11	2	0	0	1	2	1	3					0	0	0	0	0	2	2	2	2	2	2	3	1	1	0	17	2	1	0	0
276	46	1	5	3	2	11	2	0	1	1	2	1	1					0	0	0	0	0	4	4	4	4	3	4	3	3	3	0	32	2	1	0	0
277	35	1	5	3	3	10	1	0	1	1	2	1	1					0	0	0	0	0	1	1	1	1	3	3	2	2	2	0	16	2	0	0	0
278	35	1	4	3	2	10	2	1	1	1	2	1	1	2				0	0	0	0	0	3	4	4	3	1	3	3	5	3	0	29	2	0	0	0
279	36	1	1	3	2	10	2	0	1	1	2	1	3					0	0	0	0	0	3	2	1	3	4	3	3	3	3	0	25	2	0	0	0
280	39	1	5	3	2	11	2	0	1	1	1	1	1	3				0	0	0	0	0	5	5	5	5	5	5	5	5	5	0	45	2	1	0	1
281	42	2	5	4	2	10	1	1	1	1	3	1	3					0	0	0	0	0	5	5	5	5	3	4	4	1	3	0	35	2	1	0	0
282	46	1	5	3	3	11	2	0	1	1	1	1	1					0	0	0	0	0	5	5	5	5	5	5	5	5	1	0	41	2	1	0	1
283	39	2	5	4	2	12	2	0	1	0	3	1	3					0	1	1	1	1	5	5	5	5	5	5	5	5	5	5	45	2	1	1	0
284	48	1	5	1	2	12	2	1	1	0	3	0						1	0	0	1	1	3	4	5	4	4	4	4	4	4	3	36	2	1	0	0
285	41	1	4	5	2	11	2	1	1	1	1	1	1	3				0	0	4	0	0	3	5	5	5	3	2	5	2	5	4	35	2	1	0	1
286	37	1	5	3	2	12	2	1	1	1	3	1	3					0	0	1	0	1	4	4	3	4	2	4	3	4	3	2	31	2	0	0	0
287	41	1	5	3	3	13	2	0	1	1	2	1	1	2	3			1	1	1	2	2	3	1	2	4	5	4	3	1	5	7	28	2	1	1	1
288	42	1	5	3	3	12	2	0	1	1	1	1	3	5				0	0	0	1	1	5	4	4	4	3	4	4	4	5	2	37	2	1	0	1
289	44	2	5	5	2	10	2	1	1	1	3	1	3					0	0	0	0	0	5	5	5	5	5	5	5	2	5	0	42	2	1	0	0
290	43	2	4	2	1	12	2	1	1	1	1	1	3					0	0	0	0	0	4	4	4	3	4	4	4	3	3	0	33	2	1	0	1
291	45	2	5	3	3	12	2	1	1	1	1	1	1	3				0	0	0	0	0	4	4	5	5	5	5	5	5	4	0	42	2	1	0	1
292	47	2	5	5	2	12	2	1	1	1	2	1	1					0	0	0	0	0	3	3	3	2	1	1	3	2	3	0	21	2	1	0	0
293	40	1	5	3	3	12	2	1	1	1	2	1	3					0	0	0	0	0	1	1	2	1	3	5	2	1	2	0	18	2	1	0	0
294	45	1	5	3	2	12	2	1	1	1	1	1	1					1	1	1	1	1	4	4	4	4	5	5	5	4	4	5	39	2	1	1	1
295	45	1	5	3	3	11	2	1	1	1	1	1	3					0	0	0	0	0	5	5	5	3	3	4	5	2	4	0	36	2	1	0	1
296	50	2	4	2	2	12	1	0	1	1	2	1	3					0	0	0	0	0	3	4	3	3	2	3	3	2	3	0	26	2	1	0	0
297	45	2	5	5	3	12	2	1	1	1	2	1	3					0	0	0	0	0	4	3	4	2	4	4	4	2	2	0	29	2	1	0	0
298	37	1	4	4	3	10	2	0	1	1	2	1	1					0	1	0	1	0	3	3	4	4	5	4	4	2	3	2	32	2	0	0	0
299	39	1	5	1	1	11	2	0	1	1	1	1	1					0	0	0	0	0	5	5	5	5	1	5	5	5	5	0	41	2	1	0	1
300	42	2	5	2	2	11	2	1	1	1	2	1	1					0	0	0	0	0	2	5	5	5	3	3	1	1	1	0	26	2	1	0	0
301	45	2	1	2	2	11	2	1	1	1	2	1	3					0	0	0	0	0	5	3	4	3	3	3	3	4	2	0	30	2	1	0	0
302	39	1	4	2	2	10	2	1	1	1	3	0						0	0	0	0	0	4	4	4	4	4	3	4	3	4	0	34	2	1	0	0
303	37	1	4	1	3	11	2	1	1	1	2	0						0	0	0	0	0	2	2	3	1	4	3	4	5	2	0	26	2	0	0	0
304	41	1	4	1	1	11	2	0	1	1	3	1	1	3				0	0	0	0	0	5	5	5	5	4	5	4	4	3	0	40	2	1	0	0
305	36	1	1	1	1	11	1	0	1	1	3	0						0	0	0	0	0	3	3	1	3	3	3	3	3	3	0	25	2	0	0	0
306	36	2	4	2	1	11	2	1	1	1	2	1	1					0	0	0	0	0	1	4	3	3	4	3	3	2	2	0	25	2	0	0	0
307	41	1	5	2	2	11	2	1	1	1	3	1	1					0	0	0	0	0	4	4	4	4	2	5	5	5	5	0	38	2	1	0	0
308	33	1	4	4	1	10	2	0	1	1	2	1	3	4				0	0	0	0	0	4	4	4	4	4	4	4	4	4	0	36	2	0	0	0
309	39	1	5	3	2	11	1	0	1	1	2	1	1	3				0	0	0	0	0	4	5	5	4	3	5	5	2	4	0	37	2	1	0	0
310	39	1	5	3	2	11	1	0	1	1	2	1	1	3				0	0	0	0	0	4	5	5	4	3	5	5	2	4	0	37	2	1	0	0
311	37	2	4	2	1	11	2	1	1	0	2	1	3					0	0	0	0	0	4	3	4	3	2	5	5	5	2	0	33	2	0	0	0
312	29	1	1	2	2	11	2	1	1	1	1	0						0	0	0	0	0	4	4	3	3	4	4	4	3	4	0	33	2	0	0	1
313	41	2	5	4	1	11	2	0	1	0	3	0						0	0	0	0	0	4	4	4	3	4	3	4	2	4	0	32	2	1	0	0
314	33	1	4	2	3	11	1	0	1	0	1	0						0	0	0	0	0	5	5	5	5	5	5	5	5	5	0	45	2	0	0	1
315	41	2	4	2	2	11	2	1	1	1	1	1	1	3				1	2	1	1	2	5	5	5	5	5	5	5	5	5	6	45	2	1	1	1
316	36	2	5	3	2	11	2	0	1	1	3	1	1	3				0	0	0	0	0	5	5	5	5	5	5	5	5	5	0	45	2	0	0	0
317	41	2	5	3	3	11	2	0	1	1	2	0						0	0	0	0	0	3	3	3	3	4	3	3	3	2	0	27	2	1	0	0
318	49	2	5	5	2	11	2	0	1	1	3	1	1					0	0	0	0	0	5	5	2	4	4	4	4	4	5	0	37	2	1	0	0
319	33	1	5	3	2	11	2	1	1	1	1	1	1	3				0	0	0	0	0	5	5	5	4	4	4	4	4	4	0	39	2	0	0	1
320	38	1	1	2	2	11	2	0	1	1	1	1	1					1	0	0	0	0	4	4	3	3	4	4	4	3	4	1	33	2	0	0	1
321	35	1	4	1	2	10	2	1	1	1	2	1	1	2				0	0	0	0	0	3	3	3	1	2	1	2	2	4	0	21	2	0	0	0
322	33	1	5	3	2	7	2	1	1	1	2	1	3					0	0	0	0	0	2	2	4	3	5	5	3	3	3	0	30	1	0	0	0
323	37	2	5	4	2	7	2	0	1	1	1	0						0	0	0	0	0	5	5	5	4	5	5	5	4	5	0	43	1	0	0	1
324	46	1	1	4	1	7	2	0	1	1	3	1	3					0	0	0	0	0	5	5	4	5	3	3	5	5	4	0	39	1	1	0	0
325	35	1	5	3	3	7	2	1	1	1	2	1	1					0	0	0	0	0	4	4	4	4	3	4	4	4	3	0	34	1	0	0	0
326	51	2	5	3	2	7	2	0	1	1	2	1	3					0	0	0	0	0	5	4	3	4	5	5	3	4	4	0	37	1	1	0	0
327	42	2	1	4	2	7	2	0	1	1	3	0						0	0	0	0	0	4	4	4	4	2	4	4	4	4	0	34	1	1	0	0
328	36	1	5	1	2	7	2	1	1	1	3	0						0	0	0	0	0	5	5	4	4	5	5	4	3	3	0	38	1	0	0	0
329	38	1	1	1	1	7	2	0	1	1	2	0						0	0	0	0	1	3	3	3	1	3	1	3	5	3	1	25	1	0	0	0
330	38	2	5	3	2	7	2	1	1	1	2	1	1					0	0	0	0	0	4	3	2	1	5	3	3	1	1	0	23	1	0	0	0
331	32	1	5	5	2	6	2	0	1	1	3	1	1					0	0	0	0	0	5	5	5	5	1	4	5	5	5	0	40	1	0	0	0
332	40	1	1	2	2	7	2	1	1	1	3	1	3					0	0	1	0	1	4	5	5	5	5	5	5	5	1	2	40	1	1	0	0
333	40	2	4	5	2	7	2	1	1	1	2	0						0	0	0	0	0	5	5	5	5	5	4	4	4	4	0	41	1	1	0	0
334	40	1	5	1	2	7	1	1	1	1	2	1	3					0	0	0	0	0	4	3	4	3	4	3	4	2	2	0	29	1	1	0	0
335	49	1	1	5	2	7	2	0	1	1	1	0						0	0	0	0	0	5	5	5	5	5	5	5	1	5	0	41	1	1	0	1
336	41	1	4	1	2	7	2	1	1	1	2	1	3					0	0	0	0	0	3	3	4	4	4	4	3	4	4	0	33	1	1	0	0
337	36	1	5	1	2	10	2	0	1	1	3	0						0	0	0	1	0	4	4	4	3	5	3	5	3	3	1	34	2	0	0	0
338	34	1	4	4	2	10	2	1	1	1	1	1	1					1	1	0	1	1	4	4	4	3	3	3	3	3	3	4	30	2	0	0	1
339	43	2	5	3	2	9	2	1	1	1	2	1	5					0	0	0	0	0	2	4	4	4	5	5	5	3	4	0	36	1	1	0	0
340	39	1	5	3	2	8	2	0	1	1	2	1	3					0	0	0	0	0	4	4	4	3	2	4	4	3	4	0	32	1	1	0	0
341	28	1	4	1	2	9	2	0	1	1	1	1	3					0	0	0	0	0	5	5	5	5	5	5	5	4	5	0	44	1	0	0	1
342	45	1	1	1	2	9	2	0	1	1	1	0						0	0	0	0	0	5	5	5	4	4	4	5	4	2	0	38	1	1	0	1
343	40	1	5	3	2	9	2	0	1	1	2	1	5					0	0	0	0	0	2	3	3	3	4	4	3	3	3	0	28	1	1	0	0
344	37	1	5	3	2	8	2	1	1	1	2	1	3					0	0	0	0	0	3	2	3	3	3	3	3	2	2	0	24	1	0	0	0
345	42	1	5	3	2	9	2	0	1	1	2	1	2	3				0	0	0	0	0	4	4	3	3	4	4	2	2	3	0	29	1	1	0	0
346	33	1	5	3	2	9	2	1	1	1	1	1	1	2				0	0	0	0	0	5	5	5	5	2	4	4	3	4	0	37	1	0	0	1
347	33	1	4	1	3	9	2	0	1	1	2	1	5					0	0	0	0	0	4	4	3	3	4	3	4	3	3	0	31	1	0	0	0
348	38	1	5	3	2	9	2	0	1	1	2	1	5					0	0	0	0	0	3	3	3	3	3	4	4	2	3	0	28	1	0	0	0
349	36	1	5	1	2	9	2	1	1	1	2	1	2					0	0	0	0	0	4	3	4	4	4	4	4	4	4	0	35	1	0	0	0
350	42	2	5	3	3	9	2	0	1	0	2	1	1					0	0	0	0	0	3	2	2	1	4	4	3	3	3	0	25	1	1	0	0
351	37	1	5	1	2	9	2	0	1	0	2	0						0	0	0	0	0	4	4	4	3	4	2	4	4	3	0	32	1	0	0	0
352	37	2	5	3	2	9	2	1	1	1	3	1	3					0	0	0	0	0	4	4	4	3	4	4	4	3	4	0	34	1	0	0	0
353	39	1	5	1	3	9	2	1	1	1	2	0						0	0	0	0	0	2	2	3	3	3	3	3	2	3	0	24	1	1	0	0
354	38	1	1	2	1	10	2	0	1	1	3	0						0	0	0	0	0	3	3	2	4	4	4	3	3	4	0	30	2	0	0	0
355	42	1	1	2	2	8	2	0	1	1	3	0						0	0	0	0	0	4	3	4	4	2	5	5	4	4	0	35	1	1	0	0
356	38	1	5	1	2	9	2	0	1	1	2	1	1					0	0	0	0	0	4	3	2	3	3	3	3	1	3	0	25	1	0	0	0
357	35	2	4	2	2	9	2	0	0	1	2	0						1	1	0	2	0	3	3	2	2	3	3	4	2	2	4	24	1	0	0	0
358	42	1	5	4	2	9	1	1	1	1	2	1	3					0	0	0	0	0	3	3	3	3	5	3	3	3	3	0	29	1	1	0	0
359	37	1	5	3	3	9	2	1	1	1	2	1	5					0	0	0	0	0	1	1	2	3	4	3	3	1	1	0	19	1	0	0	0
360	44	2	5	4	2	8	2	0	1	1	2	0						0	0	0	1	0	3	3	4	3	2	4	3	2	3	1	27	1	1	0	0
361	38	2	5	2	2	7	2	1	1	1	1	1	3					0	0	0	0	0	5	5	5	4	4	5	5	3	4	0	40	1	0	0	1
362	40	1	4	2	2	8	1	0	1	1	3	0						1	1	1	1	1	4	4	4	4	4	4	3	3	4	5	34	1	1	1	0
363	36	1	5	3	2	10	2	0	1	1	3	1	3					0	0	0	0	0	4	4	1	4	3	4	3	3	4	0	30	2	0	0	0
364	37	1	5	3	3	10	2	1	1	1	3	1	1					0	0	0	0	0	3	3	3	3	3	3	3	3	3	0	27	2	0	0	0
365	40	1	5	3	3	10	2	1	1	0	2	0						0	1	0	0	1	4	3	3	3	4	3	3	2	5	2	30	2	1	0	0
366	42	2	5	3	2	8	2	0	1	1	1	1	3					0	0	0	0	0	5	5	5	4	5	4	3	3	5	0	39	1	1	0	1
367	41	1	5	4	2	7	1	1	1	1	3	1	3					1	1	0	0	0	3	3	1	1	1	1	3	2	3	2	18	1	1	0	0
368	33	1	5	2	2	7	2	1	1	1	1	1	1	2	3	4	5	0	0	0	0	0	5	4	5	3	3	4	3	3	4	0	34	1	0	0	1
369	43	1	5	2	1	7	1	1	1	1	3	1	1					0	0	0	1	1	4	4	4	3	4	4	4	3	4	2	34	1	1	0	0
370	35	1	5	1	2	9	2	0	1	1	3	0						0	0	0	0	0	3	2	2	3	3	4	4	3	4	0	28	1	0	0	0
371	41	1	5	3	2	10	2	1	1	1	3	1	1	3	4	5		0	0	0	0	0	4	4	3	4	4	5	5	1	3	0	33	2	1	0	0
372	42	2	5	3	1	10	2	1	1	1	1	0						0	2	1	0	0	5	5	5	3	4	5	4	3	5	3	39	2	1	0	1
373	40	1	5	1	2	10	2	0	1	1	1	1	3					0	0	0	0	0	5	4	4	4	5	5	5	4	5	0	41	2	1	0	1
374	42	1	1	3	3	10	2	0	1	1	3	1	3					0	0	0	0	0	3	4	3	3	4	4	4	3	3	0	31	2	1	0	0
375	35	1	5	3	2	10	2	0	1	1	2	1	1					0	0	0	0	0	5	5	5	4	4	4	4	3	5	0	39	2	0	0	0
376	37	1	5	1	2	9	2	0	1	1	2	0						0	0	0	0	0	4	4	4	3	2	3	3	3	4	0	30	1	0	0	0
377	30	1	1	1	3	10	2	0	0	1	3	0						0	0	0	0	0	1	1	1	1	5	5	5	5	1	0	25	2	0	0	0
378	42	2	5	1	1	10	2	0	0	1	2	1	1					0	1	1	1	0	2	2	2	2	4	2	4	2	2	3	22	2	1	0	0
379	45	2	1	4	2	7	2	0	1	1	2	1	3					0	0	0	0	0	3	1	1	3	3	5	3	5	4	0	28	1	1	0	0
380	32	1	4	4	3	10	2	1	1	0	2	1	1					0	0	0	0	0	5	5	5	5	1	1	1	1	1	0	25	2	0	0	0
381	43	1	5	3	2	10	2	1	1	1	2	1	3					1	0	0	0	0	2	1	3	4	5	2	2	1	2	1	22	2	1	0	0
382	35	1	4	1	2	9	2	1	1	1	2	1	3					0	0	0	0	0	2	2	2	3	4	4	3	3	4	0	27	1	0	0	0
383	41	2	4	2	2	10	2	1	1	1	2	1	5					0	1	2	1	0	3	3	3	4	3	2	3	2	1	4	24	2	1	0	0
384	32	1	5	1	3	9	2	1	0	1	2	1	5					0	0	0	0	0	2	1	1	2	3	2	1	3	2	0	17	1	0	0	0
385	37	1	4	2	2	9	2	0	1	1	3	0						0	0	0	0	0	4	4	2	3	4	4	3	2	4	0	30	1	0	0	0
386	41	1	5	3	2	7	2	0	1	1	3	1	1	3				2	2	0	0	2	5	5	5	4	5	5	4	2	4	6	39	1	1	1	1
387	27	1	4	1	2	7	2	0	1	1	2	1	1					0	0	0	0	0	5	5	5	3	5	5	4	2	5	0	39	1	0	0	0
388	31	1	4	2	1	7	2	1	0	0	2	1	3					1	1	0	1	0	2	2	2	3	4	3	3	2	2	3	23	1	0	0	0
389	41	2	5	2	1	11	2	1	1	1	2	0						0	0	0	0	0	3	3	3	3	3	3	3	2	3	0	26	2	1	0	0
390	45	2	5	3	2	7	2	1	1	1	2	1	1	3				0	0	0	0	0	1	1	1	4	5	5	5	1	2	0	25	1	1	0	0
391	34	2	5	3	3	7	2	0	0	1	2	1	3					0	0	0	0	0	1	1	1	1	3	1	3	1	1	0	13	1	0	0	0
392	39	1	5	1	3	6	2	1	0	1	3	1	3					0	0	0	0	0	3	2	2	3	3	3	3	2	2	0	23	1	1	0	0
393	36	1	4	1	2	6	2	0	1	1	2	1	3					0	0	0	0	0	1	4	3	3	3	2	3	3	4	0	26	1	0	0	0
394	37	2	5	2	1	9	2	1	1	1	2	1	1					0	0	0	0	0	4	4	4	4	4	3	3	2	2	0	30	1	0	0	0
395	46	1	5	1	2	7	2	1	1	1	2	0						0	0	1	0	0	2	3	3	2	4	2	3	2	3	1	24	1	1	0	0
396	43	2	4	5	3	7	2	1	1	1	3	0						0	0	0	0	0	5	5	5	5	5	5	5	1	3	0	39	1	1	0	0
397	42	1	4	2	2	8	2	0	1	1	2	0						0	0	0	2	0	4	3	4	3	4	4	5	3	4	2	34	1	1	0	0
398	32	1	1	4	2	6	2	0	1	1	1	1	3					0	0	0	0	0	3	3	5	5	3	4	4	4	4	0	35	1	0	0	1
399	40	2	5	2	2	7	2	1	1	1	2	1	3					0	0	0	0	0	4	2	4	3	4	4	4	3	3	0	31	1	1	0	0
400	35	1	4	1	2	7	2	0	1	1	2	0						0	0	0	0	0	5	3	5	5	3	5	5	3	5	0	39	1	0	0	0
401	44	1	4	1	2	6	2	1	1	1	2	1	3					0	0	0	0	0	4	4	4	3	4	4	4	3	4	0	34	1	1	0	0
402	34	1	5	1	2	7	2	1	1	1	3	0						0	0	0	0	0	4	5	5	4	5	5	5	4	4	0	41	1	0	0	0
403	29	1	4	2	1	7	2	0	0	1	2	1	1					0	0	0	0	0	1	1	1	1	4	1	2	2	1	0	14	1	0	0	0
404	44	2	5	5	3	7	2	0	1	1	3	0						0	0	0	0	0	5	5	5	5	5	5	3	5	3	0	41	1	1	0	0
405	36	1	5	2	2	8	2	0	1	1	3	0						0	0	0	1	0	4	4	4	3	5	3	5	3	3	1	34	1	0	0	0
406	25	1	1	1	2	8	2	0	1	1	3	0						0	0	0	0	0	4	5	4	4	3	2	4	4	5	0	35	1	0	0	0
407	38	2	5	3	2	8	2	0	0	0	3	0						1	1	1	1	1	5	5	5	5	5	5	5	5	5	5	45	1	0	1	0
408	42	1	5	3	3	8	2	0	1	1	1	1	3					1	0	2	0	0	4	4	4	4	4	4	3	3	4	3	34	1	1	0	1
409	38	2	5	4	3	8	2	0	1	1	3	0						0	0	0	0	0	4	4	3	3	2	2	4	3	4	0	29	1	0	0	0
410	36	1	4	2	2	8	2	0	1	1	2	1	1	3				0	0	0	0	0	4	3	3	2	4	4	4	2	4	0	30	1	0	0	0
411	44	1	5	3	2	8	2	0	1	1	3	1	1	3				0	0	0	0	0	4	4	2	3	4	4	4	2	4	0	31	1	1	0	0
412	38	1	5	1	3	9	2	1	1	1	2	1	3					0	0	1	1	1	1	4	2	1	4	4	3	1	4	4	24	1	0	0	0
413	45	1	5	1	2	8	2	0	1	1	1	1	1	2	3			0	0	0	0	0	5	5	5	5	4	4	4	4	4	0	40	1	1	0	1
414	44	2	5	5	2	8	2	0	1	1	1	1	3					0	0	0	0	0	5	5	5	5	4	4	4	4	4	0	40	1	1	0	1
415	38	2	5	2	3	8	2	0	1	1	3	0						0	0	0	0	0	4	4	4	3	5	4	3	3	3	0	33	1	0	0	0
416	41	2	5	3	2	8	2	1	1	1	2	1	3					0	0	0	0	0	4	4	4	4	5	5	5	5	5	0	41	1	1	0	0
417	34	2	5	1	2	8	2	0	1	1	1	1	3					0	0	0	0	0	1	1	1	2	4	1	2	2	2	0	16	1	0	0	1
418	40	1	5	2	2	8	2	0	1	1	3	0						0	0	0	1	0	4	4	4	4	4	4	4	4	4	1	36	1	1	0	0
419	38	1	4	1	1	8	2	1	1	1	3	0						0	0	0	0	0	3	3	3	2	4	3	4	2	4	0	28	1	0	0	0
420	38	2	1	2	2	7	2	1	1	1	2	0						0	0	0	0	0	5	5	5	5	5	5	5	1	1	0	37	1	0	0	0
421	38	1	5	2	2	11	2	1	1	1	3	1	3					0	0	0	0	0	5	5	5	5	5	2	3	3	2	0	35	2	0	0	0
422	37	2	5	2	3	9	2	1	1	1	2	1	5					0	0	0	0	0	1	1	1	1	5	1	5	5	5	0	25	1	0	0	0
423	38	2	1	4	2	9	2	1	1	1	3	0						0	0	0	0	0	3	4	4	3	4	4	4	4	4	0	34	1	0	0	0
424	34	2	4	4	2	8	2	0	1	1	1	1	3					0	0	0	0	0	4	4	4	4	4	4	4	4	4	0	36	1	0	0	1
425	33	1	5	3	2	7	2	1	1	1	3	0						0	0	0	0	0	5	5	4	4	4	4	4	4	4	0	38	1	0	0	0
426	40	1	1	1	1	8	2	1	1	1	2	1	3					1	1	1	0	1	5	5	5	2	5	1	1	4	1	4	29	1	1	0	0
427	37	1	5	3	2	10	2	0	1	1	3	0						0	0	1	1	1	3	3	3	3	3	3	3	3	3	3	27	2	0	0	0
428	40	1	5	1	2	8	2	0	1	0	2	0						0	0	0	0	0	2	2	2	1	4	2	3	1	3	0	20	1	1	0	0
429	44	2	5	5	2	9	2	0	1	1	3	1	3					0	0	0	0	0	5	5	5	5	5	5	5	5	5	0	45	1	1	0	0
430	38	2	5	3	2	8	2	1	1	1	2	1	3					0	0	0	0	0	3	3	2	2	3	3	3	2	2	0	23	1	0	0	0
431	32	1	4	2	2	8	2	1	1	1	3	1	3					0	0	0	0	0	4	3	3	3	3	3	3	2	3	0	27	1	0	0	0
432	44	2	5	3	2	11	2	1	1	1	2	1	3					0	0	0	0	0	4	4	3	3	5	3	3	3	2	0	30	2	1	0	0
433	39	2	5	3	2	11	2	1	1	1	2	1	3					0	0	0	0	0	2	2	2	1	4	3	3	1	3	0	21	2	1	0	0
434	40	1	1	2	1	11	2	0	0	1	1	1	3					2	0	4	0	0	4	4	4	4	2	3	5	3	5	6	34	2	1	1	1
435	54	2	1	2	2	12	2	1	1	0	3	0						0	0	0	0	0	3	4	2	1	3	4	4	2	2	0	25	2	1	0	0
436	38	2	4	2	2	12	2	1	1	0	2	1	1					0	0	0	0	0	3	3	3	3	3	3	3	3	3	0	27	2	0	0	0
437	34	2	4	4	2	11	2	1	1	1	3	1	3					0	0	0	0	0	1	5	5	5	3	5	3	3	5	0	35	2	0	0	0
438	41	1	4	2	2	11	2	0	1	1	2	0						0	0	0	0	0	4	4	3	3	4	4	4	3	4	0	33	2	1	0	0
439	38	1	1	2	2	12	2	1	0	1	3	0						0	0	0	0	0	4	3	4	4	4	4	4	4	4	0	35	2	0	0	0
440	37	1	5	3	3	12	2	1	1	1	2	1	3					0	0	0	0	0	4	4	4	4	4	4	4	3	2	0	33	2	0	0	0
441	36	1	1	2	2	12	2	0	1	1	1	0						0	0	0	0	0	5	5	5	4	4	4	4	4	3	0	38	2	0	0	1
442	60	2	1	5	1	11	2	1	1	0	1	1	3					1	0	0	1	0	5	4	4	4	4	5	5	3	5	2	39	2	1	0	1
443	41	2	5	2	2	12	2	0	1	1	2	1	3					0	0	0	0	0	3	4	3	3	5	4	3	3	4	0	32	2	1	0	0
444	43	1	5	3	3	10	2	0	1	1	1	1	3					0	0	0	0	0	5	5	5	5	4	4	4	3	4	0	39	2	1	0	1
445	43	1	5	1	2	12	2	0	1	1	2	0						0	0	0	0	0	3	2	3	3	4	4	3	4	4	0	30	2	1	0	0
446	44	1	4	1	2	12	2	0	1	1	1	0						0	0	0	0	0	4	4	4	3	3	4	4	3	3	0	32	2	1	0	1
447	37	1	1	1	2	12	2	1	0	1	2	0						1	0	0	0	0	2	2	2	2	2	3	3	2	2	1	20	2	0	0	0
448	45	1	4	2	2	12	2	0	1	1	3	0						0	0	0	0	0	4	4	2	4	2	5	5	5	5	0	36	2	1	0	0
449	49	1	1	1	1	12	1	0	1	0	2	0						0	0	1	0	0	2	2	2	3	2	2	3	2	1	1	19	2	1	0	0
450	39	1	4	2	3	12	2	1	1	1	3	1	3					0	0	0	0	0	5	4	5	3	4	4	4	3	4	0	36	2	1	0	0
451	45	2	5	3	1	12	2	1	1	1	2	0						0	0	0	0	0	3	3	3	3	3	3	3	2	3	0	26	2	1	0	0
452	48	2	5	3	2	13	2	1	1	1	2	1	3					0	0	0	0	0	1	1	3	4	4	3	3	3	2	0	24	2	1	0	0
453	44	1	4	1	1	12	2	1	1	1	3	0						0	0	0	0	0	3	3	3	3	2	3	4	1	3	0	25	2	1	0	0
454	42	1	5	3	2	10	2	1	1	1	3	1	3					0	0	0	0	0	4	4	4	3	5	5	4	3	3	0	35	2	1	0	0
455	45	2	4	2	2	12	2	1	0	1	2	1	1					0	0	0	0	0	2	2	2	3	2	2	4	2	2	0	21	2	1	0	0
456	39	1	5	3	3	12	2	1	1	1	2	0						0	0	0	0	0	2	1	2	2	3	3	3	4	2	0	22	2	1	0	0
457	45	2	5	3	1	12	2	1	1	1	2	0						0	0	0	0	0	3	3	3	3	3	3	3	2	3	0	26	2	1	0	0
458	37	2	1	2	1	10	2	0	1	0	3	0						0	0	0	0	0	3	4	5	1	4	5	3	5	5	0	35	2	0	0	0
459	40	1	4	1	1	12	2	0	1	1	2	1	1					0	0	0	0	0	4	4	4	4	4	4	4	4	4	0	36	2	1	0	0
460	42	1	4	3	2	12	1	0	1	1	2	0						0	0	0	0	0	2	1	2	3	3	3	2	1	3	0	20	2	1	0	0
461	44	1	1	2	1	13	2	0	0	1	2	0						0	0	0	0	0	1	1	1	1	3	2	2	2	2	0	15	2	1	0	0
462	49	2	5	5	2	11	1	0	1	1	1	0						0	0	0	0	0	1	2	2	3	1	2	2	3	4	0	20	2	1	0	1
463	42	1	5	3	2	12	2	0	1	1	3	1	5					0	0	0	0	0	4	2	5	5	4	4	4	4	4	0	36	2	1	0	0
464	37	1	4	1	1	12	2	1	1	1	1	0						0	0	0	0	0	5	5	5	5	4	5	5	5	5	0	44	2	0	0	1
465	43	1	4	3	2	12	2	0	1	1	2	1	3					0	1	0	0	0	3	3	3	3	4	4	3	4	3	1	30	2	1	0	0
466	47	2	5	3	3	12	2	1	1	1	3	1	1	3				0	0	0	0	0	4	4	3	4	5	4	4	2	5	0	35	2	1	0	0
467	48	2	4	5	1	12	2	0	0	0	2	1	1					1	2	0	0	0	2	2	3	3	3	3	4	3	2	3	25	2	1	0	0
468	41	1	5	3	2	10	2	0	1	1	2	1	3					0	0	0	0	0	4	5	5	3	2	4	3	3	2	0	31	2	1	0	0
469	42	2	4	2	3	12	2	1	1	1	2	1	3					0	0	0	0	0	4	4	4	4	4	4	4	3	4	0	35	2	1	0	0
470	42	1	5	1	2	12	2	1	0	1	2	0						0	0	0	0	0	1	1	1	3	5	5	3	3	1	0	23	2	1	0	0
471	37	1	4	2	2	12	2	1	1	1	3	1	1					0	0	0	0	0	5	5	5	5	4	5	5	3	5	0	42	2	0	0	0
472	42	1	1	1	3	12	2	1	1	1	2	1	1					0	0	0	0	0	2	4	4	3	4	5	5	3	2	0	32	2	1	0	0
473	34	1	5	1	1	12	2	0	1	1	3	1	1					0	0	0	0	0	5	5	5	3	3	5	3	1	5	0	35	2	0	0	0
474	42	2	5	2	2	9	2	1	0	1	2	0						0	0	0	0	0	2	2	3	3	4	3	3	3	2	0	25	1	1	0	0
475	42	1	5	1	2	11	2	1	1	1	3	0						0	0	0	0	0	4	2	4	4	4	4	4	4	4	0	34	2	1	0	0
476	37	1	5	2	2	12	2	0	1	1	1	0						0	0	0	0	0	4	4	5	3	4	4	4	3	4	0	35	2	0	0	1
477	41	2	1	4	2	13	2	1	1	1	3	0						0	0	0	0	0	3	2	3	3	5	2	5	2	3	0	28	2	1	0	0
478	42	1	5	2	1	12	2	0	1	1	3	1	1	3				2	1	0	1	0	4	4	4	4	4	4	4	3	4	4	35	2	1	0	0
479	39	1	4	2	2	12	2	1	1	1	2	1	3					0	0	0	0	0	4	2	1	3	4	3	3	2	4	0	26	2	1	0	0
480	38	2	5	3	2	12	2	0	1	1	2	0						0	0	0	0	0	3	2	2	1	4	3	3	2	3	0	23	2	0	0	0
481	46	2	5	3	2	12	2	0	1	1	3	1	3					0	0	0	0	0	3	3	3	3	4	4	3	2	3	0	28	2	1	0	0
482	38	1	5	3	2	10	2	0	1	1	3	0						1	0	0	0	0	3	3	4	2	4	3	3	2	3	1	27	2	0	0	0
483	39	1	5	3	2	12	2	1	1	1	3	1	1					0	0	0	0	0	4	4	4	4	5	5	5	5	4	0	40	2	1	0	0
484	40	2	4	4	2	10	2	0	0	1	2	1	3					0	0	0	0	0	3	1	2	4	3	3	2	3	4	0	25	2	1	0	0
485	39	1	1	1	2	10	2	0	1	1	1	1	3					0	0	0	0	0	4	4	4	4	4	4	4	4	4	0	36	2	1	0	1
486	43	2	5	3	2	12	1	1	1	1	3	1	1					0	0	0	0	0	2	2	2	2	4	3	3	2	4	0	24	2	1	0	0
487	40	2	1	2	2	11	2	1	1	1	2	0						0	0	0	0	0	3	4	4	3	3	4	2	4	3	0	30	2	1	0	0
488	43	2	5	2	2	11	2	0	1	0	2	1	5					0	0	0	0	0	1	2	2	4	4	4	4	3	4	0	28	2	1	0	0
489	42	1	1	1	2	11	2	0	1	1	3	1	3					0	0	0	0	0	2	2	3	3	3	4	4	4	3	0	28	2	1	0	0
490	45	2	5	3	2	11	2	1	1	1	3	1	1					0	0	0	0	0	4	4	4	4	4	5	5	5	5	0	40	2	1	0	0
491	35	1	5	2	1	11	2	1	0	1	2	0						0	0	0	0	0	1	1	2	1	2	3	4	4	5	0	23	2	0	0	0
492	38	1	5	1	2	12	2	0	1	0	1	1	1					0	0	0	0	0	1	1	1	1	4	4	4	3	4	0	23	2	0	0	1
493	42	2	5	3	2	11	2	1	1	1	3	1	1					0	0	0	0	0	4	2	4	2	4	4	4	2	2	0	28	2	1	0	0
494	45	2	4	3	3	11	2	1	1	1	1	1	3					0	0	0	0	0	4	4	5	4	3	5	5	1	5	0	36	2	1	0	1
495	35	1	1	1	1	10	2	1	0	1	2	0						0	0	0	0	0	4	4	3	3	2	3	4	3	3	0	29	2	0	0	0
496	37	2	1	2	1	10	2	0	0	0	2	1	1					0	0	0	0	0	3	3	3	3	3	3	3	4	1	0	26	2	0	0	0
497	43	1	1	1	1	11	2	1	1	0	2	1	4					0	0	0	0	0	3	3	3	3	3	3	3	3	3	0	27	2	1	0	0
498	37	1	1	1	1	11	2	0	0	1	3	1	1					0	0	0	0	0	5	3	3	2	4	2	3	3	3	0	28	2	0	0	0
499	36	1	5	2	2	10	2	0	1	1	2	1	1					0	0	0	0	0	3	1	3	3	4	4	4	4	4	0	30	2	0	0	0
500	44	1	1	1	2	11	2	1	1	1	2	0						3	0	1	3	1	4	3	1	4	5	4	2	2	4	8	29	2	1	1	0
501	33	2	5	3	2	11	1	1	1	1	2	1	5					0	0	0	0	0	4	4	3	3	4	3	2	1	3	0	27	2	0	0	0
502	42	2	5	4	2	13	2	0	0	0	3	0						0	0	0	0	0	2	2	2	2	4	3	3	2	4	0	24	2	1	0	0
503	38	1	4	2	1	11	2	1	1	0	1	1	3					0	0	1	0	0	4	4	5	3	4	3	5	3	4	1	35	2	0	0	1
504	35	1	4	2	2	12	2	0	1	1	3	1	1					2	2	0	0	0	5	4	4	4	4	4	4	4	4	4	37	2	0	0	0
505	34	1	4	1	2	10	2	0	1	1	3	0						1	0	1	0	1	4	4	5	3	4	4	4	3	4	3	35	2	0	0	0
506	36	1	1	1	1	10	2	0	0	1	2	0						0	0	0	0	0	3	3	3	3	4	3	3	3	3	0	28	2	0	0	0
507	46	2	5	4	3	11	2	1	1	1	2	1	5					0	0	0	0	0	4	4	3	4	4	4	4	4	4	0	35	2	1	0	0
508	31	1	4	1	2	11	2	0	1	1	3	0						0	0	0	1	0	2	2	2	3	3	3	3	2	3	1	23	2	0	0	0
509	36	1	4	2	2	11	2	1	1	1	3	1	3					0	0	0	0	0	3	3	4	4	5	4	4	2	3	0	32	2	0	0	0
510	42	1	4	1	3	6	2	1	1	1	1	1	3					0	0	0	0	0	4	5	4	5	2	4	5	5	4	0	38	1	1	0	1
511	43	1	5	2	2	11	2	0	1	1	2	1	5					0	2	0	0	0	2	2	3	3	4	3	4	2	2	2	25	2	1	0	0
512	47	1	1	5	2	12	2	0	1	1	1	1	3					0	0	0	0	0	1	1	5	4	5	5	5	3	5	0	34	2	1	0	1
513	38	1	5	3	2	10	2	1	0	1	2	0						0	0	0	0	0	3	3	3	2	4	4	4	4	4	0	31	2	0	0	0
514	45	1	4	2	2	10	2	0	1	1	3	0						0	0	0	0	0	5	5	5	3	1	2	3	2	5	0	31	2	1	0	0
515	37	1	4	1	2	11	2	0	1	1	1	1	3					0	0	0	0	0	5	5	5	2	4	4	4	5	5	0	39	2	0	0	1
516	36	1	4	4	2	10	2	0	1	1	2	1	3					1	0	1	0	0	1	3	4	5	4	3	3	1	3	2	27	2	0	0	0
517	36	2	4	4	2	12	2	0	1	1	1	0						0	0	0	0	0	3	3	3	3	3	3	3	3	3	0	27	2	0	0	1
518	42	1	4	2	2	11	2	0	1	0	2	1	1					1	0	0	0	0	4	4	4	4	5	3	5	4	3	1	36	2	1	0	0
519	43	1	5	1	2	11	2	0	1	1	2	1	1					0	0	0	0	0	5	4	4	5	1	5	5	4	4	0	37	2	1	0	0
520	42	1	4	4	2	11	2	1	0	0	3	0						0	0	0	0	0	3	1	3	2	4	3	3	1	1	0	21	2	1	0	0
521	43	2	5	2	1	11	2	0	1	1	2	1	2	3	4			0	1	0	0	0	3	3	3	3	4	3	3	1	3	1	26	2	1	0	0
522	38	1	1	1	2	10	2	1	1	1	2	1	1	3				0	0	0	0	0	4	4	4	3	3	3	3	3	3	0	30	2	0	0	0
523	33	1	1	2	2	11	2	1	1	0	3	0						0	0	0	0	0	3	4	4	4	2	2	2	2	5	0	28	2	0	0	0
524	40	1	1	1	1	11	2	1	1	1	2	1	1					1	1	0	0	0	3	3	3	2	3	2	3	2	3	2	24	2	1	0	0
525	40	1	4	1	2	10	2	0	0	1	2	0						0	0	0	0	0	2	2	2	2	4	3	3	3	3	0	24	2	1	0	0
526	40	2	5	2	2	11	2	1	1	1	2	1	3					0	0	0	0	0	3	3	3	3	4	4	4	4	4	0	32	2	1	0	0
527	34	2	1	5	3	10	2	1	0	1	1	1	1					0	0	0	0	0	5	5	4	4	4	4	5	4	4	0	39	2	0	0	1
528	38	1	1	1	1	11	1	0	0	1	3	0						0	1	0	0	0	3	2	2	3	3	3	3	3	3	1	25	2	0	0	0
529	39	2	4	2	2	10	2	1	1	0	3	1	3					0	0	0	0	0	3	4	3	3	4	3	3	2	2	0	27	2	1	0	0
530	34	2	1	2	2	11	2	0	1	1	2	0						0	0	0	0	0	4	2	4	4	4	4	4	4	2	0	32	2	0	0	0
531	34	2	1	2	2	12	2	0	1	1	1	0						0	0	0	0	0	4	2	4	4	4	4	4	4	2	0	32	2	0	0	1
532	48	2	5	3	2	11	2	1	1	1	1	1	1	2	3	4		0	0	0	0	0	5	5	5	5	4	4	4	4	4	0	40	2	1	0	1
533	33	1	1	1	2	12	2	0	0	1	3	1	1					0	0	0	0	0	5	5	5	5	4	5	5	5	5	0	44	2	0	0	0
534	36	2	4	1	2	11	1	1	1	1	3	1	4					0	0	0	0	0	1	4	5	5	1	1	4	2	1	0	24	2	0	0	0
535	40	2	1	2	2	10	2	0	0	1	1	1	5					0	1	1	0	0	4	4	4	1	4	5	5	4	3	2	34	2	1	0	1
536	34	1	1	2	3	12	2	1	1	1	1	1	1	3				2	2	2	0	0	5	5	5	5	5	5	5	5	5	6	45	2	0	1	1
537	44	2	4	4	3	12	2	1	1	1	1	1	1	3	4			3	4	1	0	0	5	5	5	5	5	5	5	5	5	8	45	2	1	1	1
538	39	1	1	2	2	11	2	0	0	1	2	0						0	0	0	0	0	2	2	3	4	3	2	3	2	2	0	23	2	1	0	0
539	40	2	4	2	1	11	2	0	1	1	1	1	3					0	0	0	0	0	5	5	5	5	5	5	5	5	5	0	45	2	1	0	1
540	32	1	1	1	1	10	2	0	0	1	2	0						0	0	0	0	0	2	2	3	3	4	3	2	2	3	0	24	2	0	0	0
541	38	2	5	3	2	10	2	0	1	1	1	1	1	3				0	0	0	0	0	4	4	4	4	5	5	5	5	3	0	39	2	0	0	1
542	40	1	5	2	2	11	2	1	1	1	2	1	3					0	0	0	0	0	2	2	2	3	4	3	3	3	2	0	24	2	1	0	0
543	41	1	4	1	2	11	2	0	1	1	1	1	1					0	0	0	0	0	5	5	5	5	4	4	4	4	4	0	40	2	1	0	1
544	47	2	4	2	3	10	2	0	1	1	1	1	3					0	0	0	0	0	5	5	5	5	5	5	5	5	5	0	45	2	1	0	1
545	37	1	1	1	2	11	2	1	1	1	3	1	3					1	1	1	1	1	4	4	4	3	4	5	5	4	3	5	36	2	0	1	0
546	43	1	4	3	2	11	2	1	1	1	1	0						0	2	0	0	0	4	4	4	4	5	5	5	5	5	2	41	2	1	0	1
547	34	2	1	2	2	11	2	0	0	1	2	1	4					0	0	0	0	0	3	3	2	4	5	4	4	2	2	0	29	2	0	0	0
548	40	2	1	1	1	11	1	0	0	1	2	0						0	0	0	0	0	3	2	2	2	4	4	3	3	4	0	27	2	1	0	0
549	41	1	1	2	2	12	2	1	1	1	3	1	1					0	1	0	0	0	5	5	4	4	4	4	3	4	4	1	37	2	1	0	0
550	42	2	4	2	2	12	2	1	1	0	2	1	3					0	0	0	0	0	3	3	3	2	3	3	3	2	3	0	25	2	1	0	0
551	41	2	5	1	2	11	2	0	1	1	3	0						0	0	0	0	0	3	4	1	3	3	3	3	2	3	0	25	2	1	0	0
552	50	2	4	2	2	11	2	1	1	1	1	1	3					0	0	0	0	0	4	4	4	4	2	4	4	4	4	0	34	2	1	0	1
553	44	1	5	1	2	12	2	1	1	1	3	1	3					0	0	0	0	0	3	4	3	3	5	4	3	1	3	0	29	2	1	0	0
554	39	1	4	2	2	10	2	0	1	1	1	1	3					0	1	0	0	0	5	4	5	4	4	4	3	3	4	1	36	2	1	0	1
555	37	1	1	1	2	11	2	0	0	0	2	0						0	0	0	0	1	1	1	2	3	2	2	3	3	2	1	19	2	0	0	0
556	41	2	4	4	2	12	2	1	1	1	1	1	1	5				0	0	0	0	0	4	4	4	4	5	5	5	5	5	0	41	2	1	0	1
557	38	1	4	1	2	13	2	0	1	1	2	0						0	0	0	0	0	4	3	3	4	3	3	3	3	4	0	30	2	0	0	0
558	35	1	5	2	3	12	2	0	1	1	2	0						0	2	0	0	0	4	4	4	3	5	5	3	3	3	2	34	2	0	0	0
559	43	2	5	2	1	12	2	0	1	1	1	1	1					0	0	0	0	0	1	1	1	1	1	1	1	1	1	0	9	2	1	0	1
560	38	2	1	2	2	12	2	1	1	1	1	1	3					0	0	0	0	0	4	3	3	4	1	1	1	1	1	0	19	2	0	0	1
561	39	1	4	1	3	12	2	1	1	0	3	1	3					0	0	0	0	0	3	2	3	4	2	4	4	3	2	0	27	2	1	0	0
562	34	2	5	2	1	8	2	1	0	0	2	1	3					0	0	0	0	0	1	1	1	1	5	3	3	5	4	0	24	1	0	0	0
563	39	2	1	2	2	11	2	1	1	1	3	0						0	1	1	2	1	4	4	4	4	5	5	5	5	5	5	41	2	1	1	0
564	43	1	1	2	1	11	2	0	1	1	2	0						0	0	0	0	0	3	3	3	2	3	2	3	4	4	0	27	2	1	0	0
565	61	1	1	5	1	11	2	0	1	1	2	1	3					0	0	0	0	0	4	4	4	4	3	3	2	2	2	0	28	2	1	0	0
566	40	1	4	2	1	12	2	1	1	1	2	0						0	0	0	0	0	5	5	5	5	4	4	5	4	3	0	40	2	1	0	0
567	35	2	4	2	1	11	2	0	1	0	2	1	3					0	0	0	0	0	3	3	3	3	2	2	3	3	2	0	24	2	0	0	0
568	37	2	5	3	2	11	2	1	1	1	2	0						0	0	0	0	0	3	2	2	2	4	4	3	2	2	0	24	2	0	0	0
569	40	1	4	1	2	11	2	0	0	0	3	0						1	1	1	1	1	3	3	3	4	2	4	4	4	4	5	31	2	1	1	0
570	39	2	4	2	2	10	2	1	0	1	1	0						2	2	1	0	0	5	5	5	5	5	5	5	5	3	5	43	2	1	1	1
571	37	1	1	2	2	11	2	1	0	1	2	0						0	0	0	0	0	1	5	3	3	5	4	4	4	3	0	32	2	0	0	0
572	43	1	4	3	1	11	2	0	0	1	3	1	1					0	0	0	0	0	4	4	4	4	4	5	5	3	4	0	37	2	1	0	0
573	41	2	5	3	2	11	2	1	1	1	2	1	2	3				0	0	0	0	0	3	3	3	3	3	4	3	2	2	0	26	2	1	0	0
574	35	1	1	1	2	11	2	1	0	1	3	1	3					0	0	0	0	0	3	3	3	2	4	4	3	4	3	0	29	2	0	0	0
575	49	1	5	3	3	11	2	0	1	1	2	1	3					0	0	0	0	0	5	5	5	5	1	5	5	4	5	0	40	2	1	0	0
576	37	1	4	2	2	11	2	1	1	1	2	1	1	2	3			0	0	0	0	0	3	3	2	2	4	3	2	3	2	0	24	2	0	0	0
577	57	2	1	2	3	12	2	0	1	1	2	1	4					2	0	0	0	0	5	5	1	5	5	2	5	1	3	2	32	2	1	0	0
578	25	1	1	3	2	11	2	1	0	0	3	1	3					0	0	0	0	0	1	3	3	4	3	4	4	4	4	0	30	2	0	0	0
579	49	1	4	1	1	12	2	0	1	1	3	0						0	0	0	0	0	4	4	5	3	5	5	5	5	4	0	40	2	1	0	0
580	44	2	4	2	1	12	2	0	0	1	2	1	1	3				0	0	0	0	0	1	1	1	1	1	1	1	1	1	0	9	2	1	0	0
581	42	1	1	1	2	11	2	0	1	1	3	1	3					0	0	0	0	0	4	5	5	4	4	4	4	4	4	0	38	2	1	0	0
582	30	1	4	1	2	11	2	0	0	1	2	0						2	2	1	0	0	5	5	5	4	3	4	3	3	4	5	36	2	0	1	0
583	25	1	1	1	1	7	2	1	1	1	2	1	3					0	0	0	0	0	3	3	3	4	4	4	4	4	3	0	32	1	0	0	0
584	34	2	4	4	3	8	2	0	1	1	2	0						0	0	0	0	0	5	5	5	3	1	4	4	1	1	0	29	1	0	0	0
585	35	1	4	4	2	8	2	0	1	0	2	1	2					0	0	0	0	0	1	1	1	1	1	3	3	1	1	0	20	1	0	0	0
586	32	2	5	3	2	8	2	0	0	1	2	1	3					0	0	0	0	0	1	1	1	1	5	3	5	1	1	0	19	1	0	0	0
587	37	1	5	1	1	7	2	1	0	1	2	0						0	0	0	0	0	1	1	1	1	5	2	2	2	2	0	17	1	0	0	0
588	35	1	1	1	2	7	1	1	1	1	1	1	1					0	3	0	0	3	4	4	5	4	5	4	5	4	3	6	38	1	0	1	1
589	34	2	1	5	2	10	2	0	0	0	2	0						0	0	2	2	0	4	4	4	4	4	4	2	4	4	4	34	2	0	0	0
590	44	1	5	4	2	7	2	0	0	1	2	1	3					0	0	0	0	0	3	3	2	2	4	3	3	2	2	0	24	1	1	0	0
591	39	2	5	2	2	6	2	0	1	1	2	0						0	0	0	0	0	2	2	2	2	4	3	4	1	2	0	22	1	1	0	0
592	42	1	1	1	2	8	1	0	0	1	2	1	3					0	0	0	0	0	2	3	2	2	2	2	3	1	1	0	18	1	1	0	0
593	40	1	5	3	2	7	2	1	1	1	2	1	3					0	0	0	0	0	3	3	3	3	3	3	3	3	3	0	27	1	1	0	0
594	35	1	5	4	3	9	2	0	0	1	2	1	3					0	0	0	0	0	3	2	1	1	3	2	3	5	2	0	22	1	0	0	0
595	30	1	1	1	2	10	2	1	0	0	2	0						0	0	0	0	0	3	3	3	2	4	4	5	3	5	0	32	2	0	0	0
596	39	2	5	3	2	11	2	1	1	1	2	0						0	0	0	0	0	4	4	4	3	3	3	3	2	4	0	30	2	1	0	0
597	30	1	1	2	1	10	2	0	0	1	2	1	3					0	0	0	0	0	5	5	5	5	5	5	5	5	5	0	45	2	0	0	0
598	31	1	4	1	2	8	2	1	1	1	3	0						0	0	0	0	0	3	4	4	3	4	3	5	5	2	0	33	1	0	0	0
599	40	1	5	2	1	11	2	0	0	1	3	1	3					0	0	0	0	0	3	4	2	3	4	3	3	2	2	0	26	2	1	0	0
600	40	2	1	2	1	11	2	0	0	1	2	1	5					0	0	0	0	0	3	3	3	3	3	3	3	3	3	0	27	2	1	0	0
601	34	2	1	2	1	7	2	0	0	0	2	0						0	0	0	0	0	1	2	2	2	4	5	4	4	4	0	28	1	0	0	0
602	31	2	4	4	2	7	2	0	1	1	3	1	3					0	0	0	0	0	4	4	4	2	4	4	4	4	3	0	33	1	0	0	0
603	40	1	5	1	2	7	2	1	0	1	2	1	5					0	0	1	1	0	1	1	1	2	2	2	2	2	2	2	15	1	1	0	0
604	41	2	1	2	1	7	2	1	0	1	3	1	3					0	0	0	0	0	3	3	3	3	3	3	3	3	3	0	27	1	1	0	0
605	47	2	1	4	1	7	2	1	0	1	2	1	1					0	0	0	0	0	5	4	4	4	3	5	5	3	3	0	36	1	1	0	0
606	39	1	4	2	2	9	1	1	1	1	1	1	1					0	0	0	0	0	5	5	5	5	5	5	5	5	5	0	45	1	1	0	1
607	36	1	4	2	2	6	2	0	1	1	3	1	1					0	0	0	0	0	4	4	4	3	3	2	5	2	2	0	29	1	0	0	0
608	38	1	1	1	1	7	2	1	1	1	2	1	1					0	0	0	0	0	2	2	2	3	3	3	3	3	3	0	24	1	0	0	0
609	32	2	4	4	3	8	2	1	1	1	2	1	1					0	0	0	0	0	1	1	1	3	1	4	4	1	1	0	17	1	0	0	0
610	38	1	1	1	2	8	2	1	1	1	2	1	3					2	0	0	0	0	1	2	3	3	5	4	3	4	1	2	26	1	0	0	0
611	28	1	5	1	2	7	1	1	0	0	3	1	1					0	0	0	0	0	3	3	3	3	3	3	3	3	3	0	27	1	0	0	0
612	31	1	4	2	2	7	2	1	1	1	3	1	3					0	0	0	0	0	4	4	4	4	4	4	4	3	4	0	35	1	0	0	0
613	32	1	1	1	3	7	2	0	1	1	3	1	1	2				0	0	0	0	0	3	4	4	4	4	4	4	4	4	0	35	1	0	0	0
614	38	1	5	3	2	8	2	1	1	1	2	0						0	0	0	0	0	5	5	5	5	5	5	5	2	5	0	42	1	0	0	0
615	29	2	4	4	3	6	2	1	1	0	2	0						0	0	0	0	0	5	5	5	5	4	4	5	5	3	0	41	1	0	0	0
616	43	2	5	3	2	7	2	1	1	1	3	1	3					0	0	0	0	0	4	4	4	4	3	4	4	3	4	0	34	1	1	0	0
617	34	1	1	2	2	7	2	0	1	1	1	1	3					0	0	0	0	0	5	4	5	2	2	2	5	2	4	0	31	1	0	0	1
618	43	2	4	2	2	7	2	1	1	1	2	1	1					0	0	0	0	0	2	2	2	2	4	3	2	1	3	0	21	1	1	0	0
619	28	1	1	1	2	7	2	0	1	1	1	0						0	0	0	0	0	5	5	5	5	4	4	4	4	4	0	40	1	0	0	1
620	32	1	4	2	2	6	2	0	1	1	2	0						0	0	0	0	0	4	4	4	4	4	4	4	4	4	0	36	1	0	0	0
621	36	2	4	4	3	7	2	0	1	1	2	1	1					0	0	0	0	0	3	3	3	3	3	3	3	3	3	0	27	1	0	0	0
622	37	1	5	1	2	7	2	1	1	1	3	1	3					0	0	0	0	0	4	4	4	4	4	4	4	4	4	0	36	1	0	0	0
623	39	1	4	1	2	7	2	1	1	1	2	0						0	0	0	0	0	2	2	3	3	4	3	3	2	2	0	24	1	1	0	0
624	39	1	4	1	3	7	2	0	1	1	3	0						0	0	0	0	0	3	4	4	3	3	4	3	2	2	0	28	1	1	0	0
625	33	1	5	3	2	7	2	0	1	1	2	1	1	2	3			0	0	0	0	0	3	4	2	4	5	4	5	2	2	0	31	1	0	0	0
626	35	2	5	3	1	7	1	0	1	1	2	1	1	5				0	0	0	0	0	2	2	2	1	3	3	3	2	1	0	19	1	0	0	0
627	41	2	5	3	2	7	2	0	1	0	2	1	3					0	0	0	0	0	4	4	4	4	4	4	4	4	4	0	36	1	1	0	0
628	38	2	5	2	1	7	2	1	1	1	2	1	3					1	1	1	0	0	3	3	3	2	2	3	3	1	2	3	22	1	0	0	0
629	37	2	5	1	1	7	2	1	1	1	2	1	2					0	0	0	0	0	4	4	4	3	5	5	4	3	2	0	34	1	0	0	0
630	40	1	1	1	1	7	2	1	0	1	2	0						0	1	0	0	0	1	1	1	1	2	2	2	2	2	1	15	1	1	0	0
631	36	1	4	3	2	7	2	1	1	1	2	1	1					0	0	0	0	0	4	4	4	4	5	5	5	3	1	0	35	1	0	0	0
632	48	2	5	3	2	7	2	1	1	1	2	1	3					0	0	0	0	0	2	2	2	2	4	4	3	2	3	0	24	1	1	0	0
633	38	1	5	1	2	7	2	0	1	1	3	1	3					0	0	0	0	0	4	4	4	4	5	4	4	4	3	0	36	1	0	0	0
634	44	1	1	1	2	7	2	1	1	1	1	1	3					0	0	0	0	0	5	5	5	4	5	5	4	1	5	0	39	1	1	0	1
635	48	1	1	3	1	7	2	1	0	1	2	1	3					4	0	0	0	0	5	4	5	3	1	3	3	3	3	4	30	1	1	0	0
636	34	1	4	2	3	6	2	0	1	0	2	1	3					1	1	1	1	1	5	5	5	5	5	5	5	5	5	5	45	1	0	1	0
637	33	2	5	2	2	7	2	1	1	1	2	1	3					0	0	0	0	0	3	2	3	3	4	2	3	3	1	0	24	1	0	0	0
638	36	1	4	1	3	7	1	1	1	1	3	1	1					0	0	0	0	0	4	4	4	4	4	4	4	4	4	0	36	1	0	0	0
639	40	2	5	4	3	6	2	0	1	1	2	1	1					0	0	0	0	0	4	3	5	5	5	5	5	5	3	0	40	1	1	0	0
640	34	1	4	4	1	8	2	0	1	1	1	1	2					0	0	0	0	0	5	5	5	5	5	5	5	3	5	0	43	1	0	0	1
641	45	2	5	3	3	7	2	1	1	1	3	1	3					0	0	0	0	0	4	4	4	1	5	5	5	3	5	0	36	1	1	0	0
642	39	1	4	1	3	7	2	0	1	1	3	1	2					0	0	0	0	0	3	3	3	3	3	3	3	3	3	0	27	1	1	0	0
643	52	1	1	1	3	8	1	1	1	1	3	1	3	4	5			2	0	1	2	2	4	1	2	4	3	3	3	3	3	7	26	1	1	1	0
644	37	2	5	2	2	9	2	1	1	1	2	1	2					0	0	0	0	0	5	5	5	5	5	5	5	5	4	0	44	1	0	0	0
645	40	2	4	4	2	7	2	1	1	1	2	1	1	2	4			0	0	0	0	0	4	4	4	4	5	5	5	5	5	0	41	1	1	0	0
646	37	1	4	4	2	7	2	0	1	1	2	1	1	3				0	0	0	0	0	4	4	4	4	4	4	3	3	3	0	33	1	0	0	0
647	32	1	5	1	2	7	2	0	1	1	3	0						0	0	0	0	0	4	4	4	3	2	4	3	4	4	0	32	1	0	0	0
648	33	1	1	2	2	7	2	0	1	1	2	1	3					0	0	0	0	2	4	4	4	4	2	4	4	4	4	2	34	1	0	0	0
649	30	1	4	3	2	7	2	0	1	1	2	0						0	0	0	0	0	1	2	1	1	1	1	1	1	1	0	10	1	0	0	0
650	34	1	4	2	2	7	2	0	1	1	2	0						0	0	0	0	0	3	3	3	3	3	3	3	3	3	0	27	1	0	0	0
651	37	1	4	1	1	8	2	0	1	1	1	1	1					0	2	0	0	0	3	3	3	3	3	3	3	3	3	2	27	1	0	0	1
652	29	1	4	3	1	8	2	1	1	1	3	1	1					0	0	0	0	0	2	1	2	3	3	4	3	2	1	0	21	1	0	0	0
653	39	1	1	5	2	7	1	1	1	1	2	0						0	0	0	0	0	3	1	3	3	3	3	3	3	3	0	25	1	1	0	0
654	37	1	5	3	2	7	2	1	1	1	1	1	5					2	2	2	2	0	5	5	5	5	5	5	5	5	5	8	45	1	0	1	1
655	28	1	4	1	2	7	2	0	0	1	2	0						0	0	0	0	0	4	4	4	4	4	4	4	4	3	0	35	1	0	0	0
656	38	2	5	3	1	7	2	1	1	1	1	1	3					0	0	0	0	0	5	5	5	5	5	5	5	5	5	0	45	1	0	0	1
657	42	2	4	4	2	7	2	0	0	0	2	0						0	0	0	0	0	1	1	1	1	5	5	3	5	5	0	27	1	1	0	0
658	42	2	1	4	2	7	2	1	1	1	2	1	1					0	0	0	0	0	3	4	3	4	4	4	4	4	4	0	34	1	1	0	0
659	40	2	4	2	2	7	2	1	0	1	2	1	3					0	0	0	0	0	2	2	2	3	3	3	3	2	2	0	22	1	1	0	0
660	34	1	4	1	2	7	2	0	0	1	2	0						0	0	0	0	0	3	3	3	2	5	2	4	2	3	0	27	1	0	0	0
661	41	2	4	2	2	7	1	1	1	1	1	1	3					0	0	0	0	0	5	5	5	3	3	2	4	3	4	0	34	1	1	0	1
662	41	2	4	2	1	8	2	0	0	0	2	0						0	1	0	0	0	3	3	3	3	3	3	3	3	3	1	27	1	1	0	0
663	47	1	1	1	1	13	1	0	1	1	2	1	1	2				0	0	0	0	0	3	3	3	3	4	3	3	1	1	0	24	2	1	0	0
664	35	1	1	2	3	12	2	0	1	0	2	1	3					0	1	0	0	0	3	4	4	3	3	4	4	3	4	1	32	2	0	0	0
665	36	2	4	2	2	12	2	0	1	1	2	1	1					0	0	0	0	0	4	2	1	3	3	3	3	2	3	0	24	2	0	0	0
666	37	2	4	2	1	12	2	0	1	1	2	0						0	0	0	0	0	3	3	2	3	3	3	3	3	3	0	26	2	0	0	0
667	34	1	4	1	2	12	2	1	1	0	2	0						0	0	0	0	0	4	4	3	3	3	3	3	2	3	0	28	2	0	0	0
668	45	2	4	4	2	12	2	1	0	0	2	1	1					0	0	0	0	0	3	3	4	5	5	3	5	3	5	0	36	2	1	0	0
669	49	1	4	4	1	12	2	0	0	1	2	1	2	3				0	0	0	0	0	4	4	2	2	4	2	3	2	3	0	26	2	1	0	0
670	39	1	1	1	2	12	2	0	1	1	2	1	1					2	1	1	0	0	2	2	3	3	3	4	3	3	3	4	26	2	1	0	0
671	36	1	4	2	2	12	2	1	0	1	2	0						0	0	0	0	0	4	2	5	4	4	4	5	3	4	0	35	2	0	0	0
672	43	2	1	2	2	11	2	0	1	1	3	1	3					0	0	0	0	1	3	3	3	2	2	3	3	2	2	1	23	2	1	0	0
673	42	1	5	3	2	11	2	1	1	0	1	1	5					0	0	0	0	0	5	5	5	5	4	5	5	3	5	0	42	2	1	0	1
674	45	2	1	2	2	12	2	0	1	1	1	0						0	0	0	0	0	5	5	5	5	5	5	5	5	4	0	44	2	1	0	1
675	40	1	4	2	2	12	2	1	1	1	1	1	5					0	2	1	1	1	4	4	4	3	2	3	3	3	3	5	29	2	1	1	1
676	44	2	4	4	3	12	2	0	0	1	2	0						0	0	0	0	0	3	3	2	3	3	3	3	2	2	0	24	2	1	0	0
677	38	1	4	1	1	6	1	1	0	1	2	0						0	0	0	0	0	2	2	2	2	4	4	4	4	4	0	28	1	0	0	0
678	34	1	4	1	2	12	2	0	1	1	2	1	4					0	0	0	0	0	3	3	2	4	5	4	4	2	2	0	29	2	0	0	0
679	36	2	1	2	2	12	2	0	1	1	2	1	1					0	0	0	0	0	4	4	2	4	4	4	4	2	2	0	30	2	0	0	0
680	37	1	1	1	1	11	2	0	0	1	2	1	3					0	0	0	0	0	4	4	4	4	5	4	4	4	4	0	37	2	0	0	0
681	36	1	1	4	1	11	2	1	0	1	3	1	3					0	0	0	0	0	1	1	1	1	1	5	1	1	1	0	13	2	0	0	0
682	40	2	5	3	2	10	2	0	0	1	2	0						0	1	0	0	0	2	5	3	3	4	4	3	4	3	1	31	2	1	0	0
683	40	1	4	2	2	11	2	0	1	1	2	1	5					0	0	0	0	0	3	3	3	3	3	3	3	2	3	0	26	2	1	0	0
684	38	1	1	2	2	12	2	0	1	1	2	1	5					0	0	0	0	0	4	2	3	4	4	5	5	3	4	0	34	2	0	0	0
685	40	1	4	2	1	12	2	0	1	1	2	1	1					0	0	0	0	0	4	4	4	3	4	4	4	3	3	0	33	2	1	0	0
686	49	1	5	3	2	11	2	1	1	1	2	1	3					0	0	0	0	0	3	4	3	4	5	4	4	2	2	0	31	2	1	0	0
687	37	1	5	1	2	12	2	1	1	1	2	1	1					0	0	0	0	0	3	4	3	4	4	4	4	4	4	0	34	2	0	0	0
688	41	2	1	4	2	12	2	1	0	1	2	0						0	0	0	2	0	5	5	5	5	5	5	5	5	3	2	43	2	1	0	0
689	41	1	4	1	2	12	2	1	1	1	3	0						0	0	0	0	0	4	3	2	1	2	2	3	2	2	0	21	2	1	0	0
690	44	1	5	1	2	12	2	1	0	1	1	1	3					2	1	0	0	1	2	2	4	4	4	2	3	2	2	4	25	2	1	0	1
691	41	1	1	1	2	12	2	1	0	0	3	0						0	0	0	0	0	3	3	3	3	4	4	4	3	3	0	30	2	1	0	0
692	42	1	1	1	2	12	2	1	0	1	2	1	3					1	1	2	1	0	5	5	5	5	5	5	5	5	5	5	45	2	1	1	0
693	44	2	5	3	3	12	2	1	1	1	2	1	3					0	0	0	0	0	4	3	4	3	4	4	3	3	3	0	31	2	1	0	0
694	40	1	1	1	2	10	2	0	1	1	2	1	1					0	0	0	0	0	2	2	2	4	5	3	3	2	3	0	26	2	1	0	0
695	45	1	4	1	2	12	2	0	1	1	3	0						0	0	0	0	0	5	5	5	5	3	1	2	3	2	0	31	2	1	0	0
696	51	2	1	5	2	12	2	1	1	1	3	0						0	0	0	0	0	4	4	4	3	4	5	5	4	4	0	37	2	1	0	0
697	47	2	5	2	2	12	2	1	0	1	2	1	3					0	0	0	0	0	2	1	2	2	2	2	2	5	3	0	21	2	1	0	0
698	32	1	1	1	2	11	2	1	0	1	2	1	3					0	0	0	0	0	2	2	2	2	4	4	4	4	4	0	28	2	0	0	0
699	48	1	1	2	2	11	2	1	0	0	3	1	1					0	1	0	0	0	5	5	5	4	3	2	4	2	5	1	35	2	1	0	0
700	41	2	4	5	2	11	2	0	1	1	1	1	3					0	0	0	0	0	5	5	5	5	5	5	5	4	5	0	44	2	1	0	1
701	42	2	5	2	1	11	2	1	1	1	1	1	1					0	0	0	0	0	5	5	5	5	4	4	4	4	4	0	40	2	1	0	1
702	37	1	5	3	2	11	2	0	1	1	3	1	1	2				0	0	0	0	0	5	4	5	5	5	5	4	4	3	0	40	2	0	0	0
703	36	1	1	1	2	10	2	0	0	1	3	0						0	0	0	0	0	3	4	3	3	3	3	5	2	5	0	31	2	0	0	0
704	34	1	5	2	2	11	2	1	1	1	2	0						0	0	0	0	0	3	4	4	3	4	3	4	3	3	0	31	2	0	0	0
705	47	2	4	4	3	11	2	1	1	1	1	1	1					0	0	0	2	2	5	4	5	5	5	5	5	5	5	4	44	2	1	0	1
706	39	1	4	2	3	10	2	1	1	1	2	0						0	0	0	0	0	3	3	2	3	3	3	3	2	3	0	25	2	1	0	0
707	37	2	4	3	1	10	1	0	1	1	1	1	5					0	0	0	0	0	5	4	5	3	5	5	5	5	5	0	42	2	0	0	1
708	44	1	5	1	2	10	2	1	0	1	2	1	1					0	0	0	0	0	1	1	1	1	5	5	4	5	5	0	28	2	1	0	0
709	41	1	5	3	2	11	2	1	1	0	2	1	1	2	3			3	1	0	1	1	2	2	2	2	4	4	4	4	4	6	28	2	1	1	1
710	40	1	4	2	2	11	2	1	1	1	3	0						1	1	2	1	0	5	5	5	5	5	5	5	5	5	5	45	2	1	1	0
711	38	1	5	2	3	11	2	1	1	0	2	1	1	3				2	3	1	2	0	4	4	4	3	4	4	4	2	4	8	33	2	0	1	0
712	49	2	5	5	2	10	2	0	0	1	2	0						0	0	0	0	0	1	2	2	3	1	2	2	3	4	0	20	2	1	0	0
713	38	1	5	1	2	11	1	0	0	1	2	1	5					0	0	0	0	0	1	1	1	1	1	1	1	1	1	0	9	2	0	0	0
714	59	2	1	3	2	12	2	1	0	1	2	1	1					0	0	0	0	1	3	1	1	3	4	4	4	4	1	1	25	2	1	0	0
715	39	1	1	2	1	10	1	1	0	1	2	1	3					0	0	0	0	0	3	3	2	3	4	1	4	2	1	0	23	2	1	0	0
716	45	2	4	2	2	12	2	1	0	1	3	1	2					0	0	0	0	0	4	3	3	4	4	4	4	2	3	0	31	2	1	0	0
717	31	1	1	3	1	12	2	1	0	1	2	1	1					0	0	0	0	0	1	1	1	3	3	4	3	3	2	0	21	2	0	0	0
718	36	1	1	3	3	12	2	0	1	0	3	1	3					0	0	0	0	0	4	4	4	3	3	4	3	2	1	0	28	2	0	0	0
719	32	1	4	2	2	12	2	0	1	1	2	1	1					0	0	0	0	0	4	3	2	3	4	3	4	2	4	0	29	2	0	0	0
720	41	2	1	2	2	12	2	0	1	1	3	1	3					0	0	0	0	0	5	5	5	5	2	2	2	2	2	0	30	2	1	0	0
721	40	1	1	2	1	12	2	0	0	1	3	0						0	0	0	2	1	2	2	3	3	3	4	3	2	3	3	25	2	1	0	0
722	45	2	1	2	1	12	2	1	1	1	3	1	1					0	0	0	2	1	4	4	5	4	5	5	4	4	4	3	39	2	1	0	0
723	36	1	1	1	2	11	2	1	1	1	3	0						0	0	0	0	0	5	5	5	4	5	4	5	4	4	0	41	2	0	0	0
724	35	1	1	1	2	12	2	1	1	1	2	0						0	0	0	0	0	4	4	2	2	4	4	4	2	3	0	29	2	0	0	0
725	43	2	5	3	2	12	2	1	1	1	3	1	1					0	0	0	0	0	4	4	4	4	4	4	4	4	4	0	36	2	1	0	0
726	30	2	5	2	1	6	2	1	1	1	2	1	1	2	3			0	0	0	0	0	4	4	4	4	4	4	3	3	3	0	33	1	0	0	0
727	48	1	5	1	3	7	2	1	1	1	2	1	1					0	0	0	0	0	2	4	2	2	2	2	3	1	2	0	20	1	1	0	0
728	31	1	5	4	2	7	2	1	1	1	3	1	1					0	1	1	0	0	3	3	3	3	3	3	3	3	3	2	27	1	0	0	0
729	33	2	4	4	1	12	2	0	1	1	1	1	1	3				0	0	0	0	0	4	4	4	4	2	2	5	3	5	0	33	2	0	0	1
730	39	1	1	2	1	9	2	0	1	1	2	1	2					1	1	0	0	1	4	4	5	3	4	4	4	4	5	3	37	1	1	0	0
731	37	2	4	2	2	7	2	1	1	1	2	0						0	0	0	0	0	5	5	4	4	3	5	5	5	5	0	41	1	0	0	0
732	33	1	5	3	2	7	2	1	1	0	2	1	1	2				0	1	0	0	0	4	4	2	3	5	5	5	2	5	1	35	1	0	0	0
733	43	2	5	3	2	8	2	1	1	1	3	1	3					0	0	0	0	0	5	5	5	5	1	4	3	3	3	0	34	1	1	0	0
734	32	2	1	3	1	8	2	0	0	1	2	1	3					2	2	0	0	2	2	2	2	2	5	2	3	4	4	6	26	1	0	1	0
735	30	1	1	2	1	7	2	1	1	1	3	0						0	0	0	0	0	4	4	4	3	1	4	3	4	4	0	31	1	0	0	0
736	32	1	5	3	3	7	2	1	1	1	3	1	3					0	0	0	0	0	4	4	4	3	4	3	3	3	2	0	30	1	0	0	0
737	35	1	4	1	3	6	2	1	1	1	3	0						0	0	0	0	0	4	4	4	4	3	4	4	3	4	0	34	1	0	0	0
738	26	1	4	1	2	6	1	1	0	1	2	0						0	0	0	0	0	3	3	3	1	4	4	4	1	2	0	25	1	0	0	0
739	43	2	5	3	1	7	2	0	1	1	3	0						0	0	0	0	0	5	5	5	3	5	5	5	5	5	0	43	1	1	0	0
740	32	1	4	1	2	7	2	1	1	1	3	1	3					0	0	0	0	0	4	4	4	4	4	4	4	4	4	0	36	1	0	0	0
741	39	1	1	1	1	7	2	0	1	1	2	0						0	1	0	0	0	2	3	2	2	3	3	3	2	3	1	23	1	1	0	0
742	31	1	5	1	2	7	2	1	1	1	2	1	1	2	3			0	0	0	0	0	4	4	4	4	4	4	4	3	4	0	35	1	0	0	0
743	28	1	4	1	1	7	2	1	1	1	2	0						0	0	0	0	0	3	4	3	5	1	1	1	1	1	0	20	1	0	0	0
744	37	1	5	3	2	6	2	0	0	1	3	0						0	0	0	0	0	3	3	3	3	4	4	4	2	2	0	28	1	0	0	0
745	33	1	5	1	2	7	1	1	1	1	2	1	1					0	1	0	0	0	3	4	4	4	4	2	2	2	4	1	29	1	0	0	0
746	30	1	4	2	3	6	2	0	1	1	3	1	3					0	0	0	0	0	5	4	5	4	5	5	4	3	4	0	39	1	0	0	0
747	30	1	4	3	2	7	2	0	1	1	1	0						0	0	0	0	0	5	3	5	5	1	4	3	3	4	0	33	1	0	0	1
748	31	1	4	1	2	7	2	0	1	1	1	1	3					0	0	0	0	0	5	4	4	4	4	4	4	3	3	0	35	1	0	0	1
749	34	2	5	2	3	7	2	0	1	1	2	1	3					0	0	0	0	0	4	3	4	4	4	4	4	4	4	0	35	1	0	0	0
750	30	1	1	2	3	11	1	1	0	1	3	0						0	0	0	0	0	3	3	3	3	3	3	3	3	3	0	27	2	0	0	0
751	35	1	4	4	2	8	2	1	1	1	2	1	1					0	0	0	0	0	1	4	4	1	4	4	4	2	4	0	28	1	0	0	0
752	32	1	4	2	2	9	2	0	1	1	3	1	5					0	0	0	0	0	4	4	4	3	4	4	4	3	3	0	33	1	0	0	0
753	30	1	5	3	1	7	1	1	1	1	2	1	1					0	0	1	1	1	4	3	4	3	3	2	3	3	4	3	29	1	0	0	0
754	28	1	4	2	3	8	2	1	1	1	2	1	3					0	2	0	1	0	4	5	5	5	5	4	4	4	4	3	40	1	0	0	0
755	38	1	5	4	2	7	2	0	1	1	1	1	5					0	0	0	0	0	5	5	5	5	5	5	5	4	3	0	42	1	0	0	1
756	43	1	5	3	2	7	2	0	1	1	1	1	5					2	2	2	2	0	5	5	5	5	5	5	5	5	5	8	45	1	1	1	1
757	40	1	4	2	2	7	2	0	1	1	2	1	1					0	0	0	0	0	4	4	4	4	2	4	4	3	4	0	33	1	1	0	0
758	33	1	5	2	3	7	2	1	1	1	2	1	3					1	1	1	1	1	4	4	4	4	5	5	5	3	5	5	39	1	0	1	0
759	34	1	5	1	2	6	1	0	0	1	2	1	1					0	0	0	0	0	1	1	1	1	3	3	2	3	1	0	16	1	0	0	0
760	37	2	5	3	3	7	2	1	1	1	3	1	1	3				0	1	1	0	0	3	4	3	3	4	4	4	3	3	2	31	1	0	0	0
761	43	1	5	4	3	7	2	1	1	1	2	1	3					0	1	0	0	0	3	3	1	1	3	1	3	1	1	1	17	1	1	0	0
762	38	1	5	3	3	7	2	1	1	1	2	1	1					0	0	0	0	0	1	2	2	1	3	3	3	1	3	0	19	1	0	0	0
763	37	1	5	1	2	7	1	1	1	1	2	0						0	0	0	0	0	2	1	1	1	4	2	3	2	1	0	17	1	0	0	0
764	38	1	4	1	3	8	2	0	1	1	3	0						0	0	0	0	0	4	3	4	4	4	4	3	3	3	0	32	1	0	0	0
765	32	2	1	2	2	11	2	0	1	1	2	0						0	0	0	0	0	3	4	4	3	3	3	3	3	3	0	29	2	0	0	0
766	47	2	4	4	2	7	2	0	1	1	3	1	1					0	0	1	1	1	3	3	3	2	5	3	5	5	3	3	32	1	1	0	0
767	36	1	5	2	2	7	2	0	1	1	2	1	3					1	1	0	1	0	4	4	4	3	4	4	4	3	5	3	35	1	0	0	0
768	37	2	4	2	2	7	2	1	1	1	2	1	3					0	0	0	0	0	3	3	3	3	3	3	3	3	3	0	27	1	0	0	0
769	34	1	5	1	2	7	2	0	1	1	2	0						0	0	0	0	0	4	4	4	4	4	4	4	4	4	0	36	1	0	0	0
770	38	1	1	1	1	7	2	0	1	1	2	0						0	0	0	0	0	4	4	4	4	4	4	4	3	3	0	34	1	0	0	0
771	30	1	4	1	2	7	2	1	1	1	2	1	1					0	0	0	0	0	4	4	4	4	4	4	4	4	4	0	36	1	0	0	0
772	32	1	5	3	2	7	2	0	1	1	2	0						1	0	1	0	0	3	3	4	2	5	3	3	4	3	2	30	1	0	0	0
773	40	1	4	2	1	6	2	1	1	1	3	1	2	3				0	0	0	0	0	4	5	5	4	4	4	4	3	2	0	35	1	1	0	0
774	30	1	4	1	2	7	2	0	1	1	1	1	2					0	0	0	0	0	5	5	5	5	5	5	5	5	5	0	45	1	0	0	1
775	38	2	4	3	2	7	2	1	1	1	2	0						0	0	0	0	0	3	2	2	2	3	4	3	1	2	0	22	1	0	0	0
776	29	1	1	1	2	8	2	1	1	1	2	0						0	0	0	0	0	4	4	3	4	4	3	4	4	3	0	33	1	0	0	0
777	34	1	4	1	2	7	2	0	1	1	3	0						0	0	0	0	0	5	5	4	3	4	3	3	3	4	0	34	1	0	0	0
778	33	1	5	3	2	8	2	1	1	1	2	0						0	0	0	0	0	3	4	4	3	3	3	3	1	1	0	25	1	0	0	0
779	42	1	4	1	2	7	1	0	1	1	2	1	1					0	0	0	0	0	1	1	1	1	3	3	3	1	3	0	17	1	1	0	0
780	42	2	4	2	1	9	2	0	0	1	2	0						0	0	0	0	0	3	4	5	5	3	2	3	1	1	0	27	1	1	0	0
781	33	1	4	1	3	7	2	1	0	1	1	1	1	2				2	2	2	2	0	5	5	5	5	5	5	5	5	5	8	45	1	0	1	1
782	50	2	1	2	1	6	1	1	1	1	2	0						0	0	0	0	0	3	4	4	3	3	3	3	2	4	0	29	1	1	0	0
783	32	1	4	1	2	8	2	1	1	1	2	1	1					0	0	0	0	0	3	2	3	3	3	4	3	2	2	0	25	1	0	0	0
784	35	1	4	5	3	7	2	0	1	1	3	1	1					0	0	0	0	0	5	4	5	4	1	5	4	4	4	0	36	1	0	0	0
785	31	1	5	3	2	7	2	1	1	1	3	1	3	5				2	2	1	2	0	5	4	5	4	3	2	4	3	2	7	32	1	0	1	0
786	38	1	5	1	3	7	2	0	0	1	2	1	2					0	0	0	0	0	4	4	3	3	4	3	3	2	3	0	29	1	0	0	0
787	36	2	4	4	2	8	2	0	1	1	2	1	1					0	0	0	0	0	1	1	1	1	3	1	3	1	1	0	13	1	0	0	0
788	33	2	4	2	3	7	2	0	1	1	3	1	3					0	0	0	0	0	4	4	4	4	4	3	3	3	2	0	31	1	0	0	0
789	42	1	1	3	2	7	2	1	1	1	2	1	1					0	0	0	0	0	4	4	4	3	4	3	3	3	4	0	32	1	1	0	0
790	39	2	5	3	2	7	2	0	1	1	2	0						0	0	0	0	0	3	3	3	3	3	3	3	3	3	0	27	1	1	0	0
791	53	2	5	5	2	7	2	0	1	1	2	1	3					0	0	0	2	2	5	4	5	3	5	4	5	5	5	4	41	1	1	0	0
792	33	1	5	3	3	7	2	0	1	1	3	1	3					0	0	0	0	0	5	5	5	4	4	4	4	3	4	0	38	1	0	0	0
793	48	1	4	2	1	7	2	0	1	1	1	1	1					0	0	0	0	0	4	4	4	4	4	4	4	4	4	0	36	1	1	0	1
794	44	2	4	2	2	12	2	0	1	1	1	1	3					0	0	0	0	0	5	5	5	5	1	5	5	5	3	0	39	2	1	0	1
795	36	1	5	1	2	7	2	0	1	1	3	1	3					0	0	0	0	0	4	4	3	3	4	4	4	3	3	0	32	1	0	0	0
796	35	2	5	2	1	7	2	1	1	1	2	1	3					0	0	0	0	0	3	3	3	3	3	3	3	3	3	0	27	1	0	0	0
797	37	1	5	3	3	8	1	1	0	0	2	1	1	3				0	0	0	0	0	3	3	3	3	3	3	3	1	3	0	25	1	0	0	0
798	55	1	1	1	3	7	2	0	1	1	2	1	2					0	0	0	0	0	4	4	4	4	4	4	4	3	5	0	36	1	1	0	0
799	42	2	5	3	3	8	2	1	1	0	2	0						0	0	0	0	0	3	3	2	3	4	4	4	1	2	0	26	1	1	0	0
800	37	1	5	1	2	7	2	1	1	1	3	1	3					0	1	0	0	0	3	3	3	3	3	3	3	3	3	1	27	1	0	0	0
801	35	2	4	2	2	7	2	0	1	1	1	1	1					2	3	4	4	1	5	5	5	5	5	5	5	5	5	14	45	1	0	1	1
802	35	2	4	2	2	9	2	0	1	1	1	1	3					0	0	0	0	0	5	5	5	3	5	3	5	3	5	0	39	1	0	0	1
803	33	2	4	2	2	7	2	0	1	0	2	1	3					2	1	1	1	1	5	4	4	1	3	3	3	1	3	6	27	1	0	1	0
804	30	1	4	1	2	7	2	0	1	1	3	0						0	0	0	0	0	4	4	4	3	4	4	4	2	4	0	33	1	0	0	0
805	43	1	5	3	2	7	2	1	1	1	2	1	3					0	1	1	0	1	4	4	4	3	3	3	3	2	3	3	29	1	1	0	0
806	41	1	5	2	2	7	2	1	1	1	2	0						0	0	0	0	0	4	4	4	3	4	3	4	5	4	0	35	1	1	0	0
807	32	1	5	2	2	7	2	1	1	1	3	1	3					2	0	0	0	0	4	4	4	4	4	4	4	4	3	2	35	1	0	0	0
808	34	1	1	2	1	7	2	1	1	1	2	0						0	1	0	0	1	1	1	2	2	2	4	2	2	2	2	18	1	0	0	0
809	28	1	1	1	2	6	2	0	1	1	2	0						0	0	0	0	0	3	3	3	3	3	3	3	3	2	0	26	1	0	0	0
810	36	2	4	2	2	7	2	0	1	1	2	1	1	2	3	4		0	0	0	0	0	3	3	3	3	3	3	3	3	3	0	27	1	0	0	0
811	44	1	5	2	2	8	2	1	1	1	2	0						0	0	0	0	0	4	1	4	1	4	5	3	3	4	0	29	1	1	0	0
812	32	2	4	4	2	8	2	1	0	1	2	0						0	0	0	0	0	2	1	1	1	3	1	3	1	1	0	14	1	0	0	0
813	35	1	4	2	2	9	2	1	1	1	2	1	1					0	0	0	0	0	3	3	3	3	3	3	3	3	3	0	27	1	0	0	0
814	40	1	1	1	2	6	2	1	1	1	2	1	1	3				0	0	0	0	0	2	2	2	2	3	2	2	4	2	0	21	1	1	0	0
815	39	2	4	2	2	7	2	1	1	1	2	1	1	5				0	0	0	0	0	3	4	3	3	5	3	2	1	5	0	29	1	1	0	0
816	29	2	5	2	2	8	2	1	1	1	3	0						4	0	2	4	4	3	4	4	3	4	3	3	3	4	14	31	1	0	1	0
817	42	1	4	4	2	8	2	0	0	1	2	1	2					0	0	0	0	0	1	1	1	1	2	1	2	1	1	0	11	1	1	0	0
818	28	1	4	4	2	8	2	1	0	1	2	1	2					2	0	0	1	0	2	2	2	2	2	5	3	2	4	3	24	1	0	0	0
819	34	1	5	3	2	7	2	0	1	1	3	1	2					0	0	0	0	0	4	4	3	3	3	4	4	5	4	0	34	1	0	0	0
820	37	2	5	3	2	6	2	0	0	1	2	1	3					0	0	0	0	0	1	1	3	3	5	3	3	3	3	0	25	1	0	0	0
821	33	1	1	2	1	8	2	0	1	1	1	0						0	0	0	0	0	4	4	4	4	5	5	5	5	4	0	40	1	0	0	1
822	43	2	4	2	2	7	2	1	1	1	2	1	3					0	0	0	0	0	3	3	3	2	5	3	4	5	5	0	33	1	1	0	0
823	27	1	5	3	2	6	2	0	1	1	1	0						0	0	0	0	0	4	4	4	3	4	3	5	3	4	0	34	1	0	0	1
824	30	1	5	2	1	6	2	0	1	0	2	0						0	0	0	0	0	4	3	4	4	4	3	3	3	4	0	32	1	0	0	0
825	31	1	1	2	1	7	2	1	1	1	1	1	2					0	0	0	0	0	4	3	5	3	4	4	5	4	3	0	35	1	0	0	1
826	32	1	5	1	2	7	1	1	1	1	1	1	3					0	1	0	0	0	5	5	5	5	1	5	5	5	5	1	41	1	0	0	1
827	33	1	1	3	1	7	2	0	1	1	2	1	1					0	1	0	1	1	3	3	3	3	3	3	3	3	3	3	27	1	0	0	0
828	30	1	4	1	3	7	2	1	1	1	3	1	1					0	0	1	0	0	4	4	5	4	5	5	5	5	5	1	42	1	0	0	0
829	32	1	4	2	1	7	2	0	1	1	2	0						0	0	0	1	0	4	4	3	3	4	3	4	3	2	1	30	1	0	0	0
830	35	1	5	3	2	7	1	0	1	1	2	1	1					0	0	0	0	0	2	3	2	3	4	4	4	4	4	0	30	1	0	0	0
831	40	2	5	3	2	7	2	1	1	1	2	1	1					1	0	0	0	0	2	2	2	3	5	2	4	2	3	1	25	1	1	0	0
832	40	2	1	4	1	7	2	0	0	1	1	0						0	0	0	2	2	3	3	3	3	3	3	3	3	3	4	27	1	1	0	1
833	37	1	5	1	1	7	2	0	1	1	2	0						0	1	1	1	0	4	4	3	3	3	3	3	3	3	3	29	1	0	0	0
834	47	1	4	4	2	6	2	1	1	1	3	1	1	3				0	0	0	0	0	3	3	3	3	3	2	3	3	2	0	25	1	1	0	0
835	38	1	5	2	2	6	2	0	1	1	2	1	3					0	0	0	0	0	4	5	5	5	5	4	3	4	4	0	39	1	0	0	0
836	44	2	5	3	2	6	2	1	1	1	3	1	1	5				0	0	0	0	0	4	4	4	4	5	5	5	2	5	0	38	1	1	0	0
837	42	1	4	4	3	8	1	1	1	0	2	1	1					1	1	0	1	2	3	2	4	4	4	5	2	3	3	5	30	1	1	1	0
838	38	1	5	3	2	7	2	1	0	0	1	0						0	0	0	0	0	5	4	4	4	5	4	4	2	3	0	35	1	0	0	1
839	34	2	4	2	2	9	2	1	1	1	2	0						0	0	0	0	0	3	2	2	1	2	2	3	2	1	0	18	1	0	0	0
840	36	1	4	1	3	7	2	1	1	1	3	0						0	0	0	0	0	1	1	1	1	1	1	1	3	2	0	12	1	0	0	0
841	33	1	1	3	1	7	1	1	1	1	2	1	1					0	0	0	0	0	3	3	3	3	3	3	3	3	3	0	27	1	0	0	0
842	40	1	5	3	2	9	2	1	1	1	3	0						0	0	0	0	0	4	5	4	3	5	4	4	2	4	0	35	1	1	0	0
843	41	2	5	2	3	7	2	0	1	1	2	1	3					0	0	0	0	0	2	4	2	3	4	5	2	2	4	0	28	1	1	0	0
844	32	1	4	2	2	6	2	1	1	1	3	1	1					0	0	0	0	0	3	3	3	3	3	3	3	3	3	0	27	1	0	0	0
845	41	2	4	4	2	7	2	1	1	1	1	1	5					1	2	2	0	0	5	5	5	5	5	5	5	3	5	5	43	1	1	1	1
846	41	2	4	2	2	7	2	1	1	1	2	0						0	0	0	0	0	3	4	3	2	4	4	3	3	3	0	29	1	1	0	0
847	32	2	1	2	2	7	2	1	0	1	3	0						0	0	0	0	0	3	3	3	3	3	2	3	2	3	0	25	1	0	0	0
848	39	1	1	4	1	7	2	0	0	0	2	1	1					0	0	0	0	0	3	3	2	2	5	1	5	5	1	0	27	1	1	0	0
849	33	2	4	4	3	7	2	1	1	1	1	1	1					0	0	0	0	0	5	5	5	5	5	5	5	3	3	0	41	1	0	0	1
850	32	1	1	1	1	7	2	1	0	1	2	1	3					0	0	0	0	0	1	2	3	2	2	3	3	4	2	0	22	1	0	0	0
851	42	2	1	2	2	8	2	0	1	1	3	0						0	0	0	0	0	3	3	3	3	3	3	3	3	3	0	27	1	1	0	0
852	33	2	5	3	2	7	2	1	1	1	1	1	3					0	0	0	0	0	3	3	3	2	4	2	2	3	3	0	25	1	0	0	1
853	33	1	5	3	1	6	2	1	1	1	1	1	2	3				1	1	1	0	0	4	4	5	3	4	4	4	3	4	3	35	1	0	0	1
854	54	2	5	3	2	10	2	1	1	1	1	1	1					3	2	2	3	0	5	5	5	5	5	5	5	5	5	10	45	2	1	1	1
855	45	1	4	2	2	8	2	0	1	1	2	1	1					0	0	0	0	0	3	5	5	5	5	5	5	5	3	0	41	1	1	0	0
856	42	1	1	1	2	7	2	1	1	1	1	1	3					0	0	0	0	0	4	5	5	4	4	4	4	4	4	0	38	1	1	0	1
857	43	1	1	1	2	7	2	1	0	1	1	1	1	2				0	2	0	0	0	4	5	4	4	2	2	4	2	3	2	30	1	1	0	1
858	38	1	4	1	2	6	2	0	1	1	1	1	1					0	0	0	0	0	4	4	4	4	4	4	4	4	4	0	36	1	0	0	1
859	32	1	5	3	2	9	2	1	1	1	2	1	1	3				0	0	0	1	1	3	4	3	3	5	5	4	1	4	2	32	1	0	0	0
860	42	1	5	3	2	8	2	1	1	1	2	1	1	2				0	0	0	0	0	4	4	3	3	4	3	2	2	3	0	28	1	1	0	0
861	36	1	4	3	2	7	2	1	1	1	3	1	5					0	0	0	0	0	4	3	4	3	3	4	3	3	3	0	30	1	0	0	0
862	44	2	4	2	1	7	2	1	1	0	2	1	3					0	0	0	0	0	3	4	4	3	4	3	4	3	4	0	32	1	1	0	0
863	40	2	5	3	2	7	2	1	1	1	1	1	3					0	0	0	0	0	5	5	5	5	5	5	5	4	5	0	44	1	1	0	1
864	41	2	5	3	2	7	2	1	1	1	1	1	1					0	0	0	0	0	1	2	1	2	2	2	2	3	4	0	19	1	1	0	1
865	31	1	4	2	2	7	2	0	0	1	2	1	3					0	0	2	0	0	4	3	3	3	5	3	5	3	3	2	32	1	0	0	0
866	41	1	5	3	2	9	2	1	1	1	2	1	3					0	0	0	0	0	4	4	3	3	3	3	3	1	3	0	27	1	1	0	0
867	28	1	1	2	2	7	2	1	1	1	3	0						0	0	0	0	0	5	4	5	5	5	5	5	5	5	0	44	1	0	0	0
868	30	1	5	1	3	7	2	0	1	1	1	0						0	0	0	0	0	4	5	4	4	4	4	5	4	3	0	37	1	0	0	1
869	31	1	4	3	1	7	2	1	0	1	2	1	1	2				0	0	0	0	0	1	2	2	1	3	2	2	2	1	0	16	1	0	0	0
870	34	1	1	3	1	11	2	1	0	1	2	0						3	2	0	0	0	3	3	3	1	3	3	3	3	3	5	25	2	0	1	0
871	40	1	5	1	1	7	1	1	1	1	2	1	1					0	0	0	0	0	2	2	2	3	3	3	3	2	2	0	22	1	1	0	0
872	28	1	4	1	2	7	2	1	1	1	3	0						0	0	0	0	0	1	1	1	1	4	4	4	4	4	0	24	1	0	0	0
873	38	2	5	3	3	7	2	0	1	1	2	1	3					0	0	0	0	0	4	4	3	3	4	3	3	3	3	0	30	1	0	0	0
874	36	1	5	3	2	7	2	0	1	1	2	1	3					0	0	0	0	0	3	3	3	3	4	2	4	1	1	0	24	1	0	0	0
875	31	1	5	1	1	7	2	0	1	1	3	1	1	2	3	4		0	0	0	0	0	4	4	4	4	4	4	4	3	3	0	34	1	0	0	0
876	35	1	5	3	2	7	2	1	1	1	2	1	2					0	0	0	0	0	3	2	2	2	2	4	3	1	3	0	22	1	0	0	0
877	43	1	4	2	2	6	2	0	1	1	3	1	5					2	2	2	2	0	5	5	5	5	5	5	5	5	4	8	44	1	1	1	0
878	36	2	5	2	3	6	2	1	1	1	2	1	1	2	3	5		0	0	0	0	0	1	1	1	1	2	1	1	1	1	0	10	1	0	0	0
879	42	2	1	3	2	6	1	1	1	1	1	0						0	0	0	0	0	4	4	4	4	4	4	4	4	4	0	36	1	1	0	1
880	32	1	4	1	2	7	2	1	1	1	2	1	3					0	0	0	0	0	4	3	3	3	3	3	3	2	3	0	27	1	0	0	0
881	34	1	1	1	2	7	2	0	0	1	2	0						0	0	0	0	0	2	2	2	2	3	3	3	1	2	0	20	1	0	0	0
882	36	1	1	1	2	7	2	0	0	1	2	0						0	0	0	0	0	3	3	3	3	3	3	3	3	2	0	26	1	0	0	0
883	40	2	4	2	2	7	2	0	1	1	3	1	3					0	0	0	0	0	3	4	4	4	2	4	4	4	3	0	32	1	1	0	0
884	37	1	4	1	1	7	2	0	1	1	3	1	1					0	0	0	0	0	3	4	3	3	4	4	4	3	3	0	31	1	0	0	0
885	40	1	1	1	1	8	2	0	1	1	2	0						0	0	0	0	0	4	4	3	3	4	3	3	2	4	0	30	1	1	0	0
886	28	1	4	1	2	7	2	0	1	1	2	1	3					0	0	0	0	0	2	2	2	2	3	3	2	2	2	0	20	1	0	0	0
887	42	2	1	2	2	7	2	1	0	1	2	0						0	0	0	0	0	2	3	2	3	3	2	4	4	4	0	27	1	1	0	0
888	39	1	1	1	3	7	2	1	1	1	2	0						0	0	0	0	0	3	2	2	4	2	2	4	2	2	0	23	1	1	0	0
889	41	2	4	2	2	7	2	0	1	1	2	0						0	0	0	0	0	4	4	5	3	4	5	5	2	5	0	37	1	1	0	0
890	28	1	4	1	2	7	2	0	1	1	2	1	3					0	0	0	0	0	2	2	2	2	3	3	2	2	2	0	20	1	0	0	0
891	45	1	1	1	2	11	1	1	1	1	2	1	1					0	0	0	0	0	4	1	1	1	5	4	4	4	4	0	28	2	1	0	0
892	31	1	4	1	1	7	2	0	0	1	2	0						0	0	0	0	0	1	1	4	1	4	1	1	1	2	0	16	1	0	0	0
893	27	2	1	2	1	7	2	0	1	1	1	1	1					3	2	2	3	0	5	5	5	5	5	5	5	5	5	10	45	1	0	1	1
894	30	1	5	4	2	7	2	0	1	1	2	1	3					0	0	0	0	0	3	3	3	3	4	3	4	3	3	0	29	1	0	0	0
895	28	1	4	1	2	7	2	0	1	1	2	1	3					0	0	0	0	0	2	2	2	2	3	3	2	2	2	0	20	1	0	0	0
896	42	1	1	1	2	7	2	0	1	1	3	0						0	0	0	0	0	4	4	4	4	2	4	4	4	3	0	33	1	1	0	0
897	46	2	5	3	1	9	1	0	1	1	1	1	3					0	0	0	0	0	5	5	5	5	4	4	4	4	4	0	40	1	1	0	1
898	44	2	5	2	1	9	1	1	1	1	1	1	3					0	0	0	0	0	2	2	2	3	4	3	3	3	2	0	24	1	1	0	1
899	30	1	5	1	1	8	2	0	1	1	2	1	2					0	0	0	0	0	3	1	3	1	1	3	3	1	3	0	19	1	0	0	0
900	46	2	5	3	2	6	2	0	1	1	1	1	3					0	1	0	0	0	5	5	5	4	4	4	4	2	4	1	37	1	1	0	1
901	39	1	5	2	2	6	2	1	1	1	3	1	5					0	0	0	0	0	4	4	4	3	4	4	3	3	3	0	32	1	1	0	0
902	37	2	5	2	1	9	2	0	1	0	3	1	2					0	0	0	0	0	4	3	3	4	4	3	3	2	3	0	29	1	0	0	0
903	35	2	5	3	2	7	1	1	1	1	3	1	1					0	0	0	0	0	4	4	2	4	5	4	4	2	4	0	33	1	0	0	0
904	39	2	5	1	3	13	2	0	1	1	1	0						0	0	0	0	0	1	1	1	1	4	4	3	3	4	0	22	2	1	0	1
905	44	2	5	3	3	9	2	0	1	1	1	0						3	0	0	0	0	1	1	1	1	3	3	3	1	3	3	17	1	1	0	1
906	36	2	5	3	2	6	2	0	1	1	2	0						0	0	0	3	0	4	4	5	4	5	5	4	4	4	3	39	1	0	0	0
907	42	1	5	2	1	6	1	1	1	1	2	1	3					2	0	0	0	0	3	2	2	1	4	3	2	5	2	2	24	1	1	0	0
908	38	1	5	2	1	8	2	1	1	1	3	0						1	1	0	3	0	3	4	4	4	2	4	3	3	3	5	30	1	0	1	0
909	40	1	5	2	1	9	2	1	1	1	1	1	3					0	0	0	0	0	4	4	4	4	4	4	3	2	4	0	33	1	1	0	1
910	36	2	5	3	2	7	2	1	1	1	2	1	3					0	0	0	0	0	1	1	1	1	3	3	1	1	1	0	13	1	0	0	0
911	37	1	5	3	2	8	2	1	1	1	3	1	3					0	2	2	0	2	4	4	2	3	4	5	4	3	3	6	32	1	0	1	0
912	33	1	5	1	2	11	2	0	1	1	2	1	1					0	0	0	0	0	3	2	3	3	3	3	3	3	2	0	25	2	0	0	0
913	36	1	5	2	2	6	2	1	1	1	3	0						0	1	0	0	0	4	4	4	3	2	4	4	2	4	1	31	1	0	0	0
914	30	1	5	1	2	6	2	0	1	1	1	1	3					0	2	0	0	1	5	5	5	4	4	4	4	3	4	3	38	1	0	0	1
915	44	1	5	3	2	9	1	1	1	1	1	1	5					0	0	0	0	0	5	5	5	2	5	5	5	5	5	0	42	1	1	0	1
916	35	1	5	3	3	9	1	0	1	1	2	1	5					0	2	0	0	0	3	3	3	2	4	3	2	1	3	2	24	1	0	0	0
917	38	2	5	3	2	9	2	0	1	1	2	1	3					0	2	0	1	0	4	4	5	2	4	4	4	2	2	3	31	1	0	0	0
918	36	1	5	1	2	8	2	0	1	1	2	1	1					0	0	0	0	0	3	2	1	1	3	1	1	1	1	0	14	1	0	0	0
919	35	1	5	1	2	8	2	0	1	1	1	1	1					0	0	0	1	1	5	5	5	4	3	4	4	2	5	2	37	1	0	0	1
920	39	1	5	1	2	8	1	0	0	1	2	1	3					1	0	0	0	0	1	1	1	3	3	1	1	1	1	1	13	1	1	0	0
921	34	1	5	3	2	6	2	1	1	1	3	1	3					2	0	0	0	0	3	3	3	2	4	3	3	2	2	2	25	1	0	0	0
922	33	1	5	1	1	8	2	0	1	1	3	1	3					0	0	0	0	0	4	4	4	2	3	3	3	3	3	0	29	1	0	0	0
923	36	1	5	1	1	6	2	1	1	1	2	1	3					0	1	3	0	0	3	2	2	2	4	3	3	2	3	4	24	1	0	0	0
924	32	2	5	2	3	9	2	0	1	1	3	1	3					0	0	0	0	0	3	4	4	3	4	3	3	2	3	0	29	1	0	0	0
925	39	1	5	3	1	6	1	1	1	1	3	0						0	1	2	2	1	5	3	2	5	2	2	4	3	2	6	28	1	1	1	1
926	36	1	5	3	2	9	2	0	1	1	2	1	1					2	0	0	0	0	1	1	1	1	3	2	3	1	3	2	16	1	0	0	0
927	39	1	5	2	2	10	2	0	1	1	2	1	3					0	0	0	0	0	4	4	4	3	4	4	3	2	4	0	32	2	1	0	0
928	45	1	5	1	1	9	2	1	0	1	2	1	3					0	0	0	0	0	1	1	1	1	3	1	1	1	1	0	11	1	1	0	0
929	36	1	5	3	2	6	2	1	1	1	3	1	3					0	0	0	0	0	4	4	5	4	4	2	5	3	4	0	35	1	0	0	0
930	37	1	5	3	2	10	2	1	1	1	1	1	3					0	0	0	0	0	4	4	3	2	4	4	3	2	3	0	29	2	0	0	1
931	38	1	5	3	2	6	2	1	1	1	2	1	1					0	1	2	0	1	4	4	4	2	5	4	3	1	3	4	30	1	0	0	0
932	39	1	5	3	3	9	1	1	1	1	1	1	5					0	0	0	0	0	4	4	4	3	4	4	4	2	4	0	33	1	1	0	1
933	42	1	5	1	2	8	2	1	1	1	1	1	5					1	2	0	0	0	4	4	4	4	5	4	4	3	4	3	36	1	1	0	1
934	34	2	5	3	2	8	2	1	1	1	1	1	3					0	0	0	0	0	5	5	5	4	5	5	5	5	5	0	44	1	0	0	1
935	43	1	5	1	1	7	1	1	1	1	2	0						0	0	0	0	0	3	3	3	1	3	3	3	2	2	0	23	1	1	0	0
936	42	1	5	3	1	7	2	0	1	1	1	1	5					0	0	0	0	0	5	5	5	4	4	4	4	3	4	0	38	1	1	0	1
937	43	1	5	4	3	11	2	0	1	1	1	1	3					0	0	0	0	0	5	5	5	5	5	5	5	5	5	0	45	2	1	0	1
938	41	2	5	3	3	10	1	1	1	1	3	1	3					0	1	0	0	0	5	5	5	5	5	5	5	4	4	1	43	2	1	0	0
939	39	1	5	1	2	8	2	1	1	1	3	0						2	0	0	0	0	5	5	5	3	4	5	5	2	4	2	38	1	1	0	0
940	42	2	5	3	3	11	2	0	1	0	1	1	3					0	0	0	0	0	4	4	4	4	4	5	5	4	5	0	39	2	1	0	0

## Sheet: Sayfa2
CODE BOOK	No	code
Gender	1	FEMALE
	2	MALE
Education Level	1	Primary education
	4	High school
	5	University
Employment status	1	Not working
	2	Employee
	3	Government employees
	4	Self-employment
	5	Retired
Income status	1	Income less than expenses
	2	Income equals expense
	3	Income more than expenses
Childhood chronic illness	1	Yes
	2	No
Family history of COVID-19 disease	0	No
	1	Yes
Parents' COVID-19 vaccination status	0	No
	1	Yes
Childhood vaccination status	0	No
	1	Yes
Parents' intentions to vaccinate their children with COVID-19	1	Yes
	2	No
	3	Hesitant
Status of recive information about the COVID-19 vaccine	1	Yes
	0	No
Who	1	physician
	2	Midwife and nurse
	3	Press and publishing organs
	4	Relatives and neighbors
	5	the other
Child Age Categorical	1	9 years and under
	2	10 years and more
Parent Age Categorical	0	38 years and under
	1	39 years and more
(CAS) Anxiety categorical	0	No
	1	Yes
Parents' intentions to vaccinate their children against COVID-19 are categorical	0	No
	1	Yes
